# Supplementary material for: Vulgarisin-type diterpenoids from self-heal (Prunella vulgaris) and their neuroprotective effects against ischemia/reperfusion (I/R) via a mitochondria-related pathway
Source: Royal Society of Chemistry journal article supplement (doi:10.1039/d2fo00150k), 2022-01-01
Supplement: d2fo00150k1.pdf [file d2fo00150k1.pdf]

## Electronic supplementary information (ESI)

### **Vulgarisin-type diterpenoids from self-heal (*Prunella vulgaris*) and their neuroprotective effects against ischemia/reperfusion (I/R) via mitochondria-related pathway**

Fengwei Ma,<sup>a,b,c,d,‡</sup> Qingfang Deng,<sup>a,e,‡</sup> Huayong Lou,<sup>b,c</sup> Jinyu Li,<sup>b,c</sup> Su Xu,<sup>d</sup> Wenneng Wu,<sup>d</sup> Qihua Wen,<sup>d</sup> Lei Tang,<sup>b</sup> Xin Wang<sup>\*a</sup> and Weidong Pan<sup>\*b,c</sup>

<sup>a</sup> State Key Laboratory of Cellular Stress Biology, Fujian Provincial Key Laboratory of Neurodegenerative Disease and Aging Research, Institute of Neuroscience, School of Medicine, Xiamen University, Xiamen, Fujian 361005, China

<sup>b</sup> State Key Laboratory of Functions and Applications of Medicinal Plants, Guizhou Medical University, Guiyang 550014, China

<sup>c</sup> The Key Laboratory of Chemistry for Natural Products of Guizhou Province and Chinese Academy of Science, Guiyang 550014, China

<sup>d</sup> Food and Pharmaceutical Engineering Institute, Guiyang University, Guiyang, Guizhou, 550005, China

<sup>e</sup> Key Laboratory for Information System of Mountainous Areas and Protection of Ecological Environment, Guiyang Normal University, Guiyang, Guizhou, 550001, China

---

<sup>‡</sup> These authors contributed equally to this work

\* Corresponding authors. Xin Wang and Weidong Pan; E-mail address of Xin Wang ([wangx@xmu.edu.cn](mailto:wangx@xmu.edu.cn)) and Weidong Pan ([wdpan@163.com](mailto:wdpan@163.com))

## Table of Contents

- Fig. S1**  $^1\text{H}$  NMR spectrum of vulgarisin G (1)
- Fig. S2**  $^{13}\text{C}$  NMR spectrum of vulgarisin G (1)
- Fig. S3** HSQC spectrum of vulgarisin G (1)
- Fig. S4** HMBC spectrum of vulgarisin G (1)
- Fig. S5**  $^1\text{H}$ - $^1\text{H}$  COSY spectrum of vulgarisin G (1)
- Fig. S6** NOESY spectrum of vulgarisin G (1)
- Fig. S7** UV and CD spectra (experimental and calculated) of vulgarisin G (1)
- Fig. S8** MS and MS<sup>2</sup> spectra of vulgarisin G (1)
- Fig. S9** FT-IR spectrum of vulgarisin G (1)
- Fig. S10**  $^1\text{H}$  NMR spectrum of vulgarisin H (2)
- Fig. S11**  $^{13}\text{C}$  NMR spectrum of vulgarisin H (2)
- Fig. S12** HSQC spectrum of vulgarisin H (2)
- Fig. S13** HMBC spectrum of vulgarisin H (2)
- Fig. S14**  $^1\text{H}$ - $^1\text{H}$  COSY spectrum of vulgarisin H (2)
- Fig. S15** NOESY spectrum of vulgarisin H (2)
- Fig. S16** UV and CD spectra (experimental and calculated) of vulgarisin H (2)
- Fig. S17** MS and MS<sup>2</sup> spectra of vulgarisin H (2)
- Fig. S18** FT-IR spectrum of vulgarisin H (2)
- Fig. S19**  $^1\text{H}$  NMR spectrum of vulgarisin I (3)
- Fig. S20**  $^{13}\text{C}$  NMR spectrum of vulgarisin I (3)
- Fig. S21** HSQC spectrum of vulgarisin I (3)
- Fig. S22** HMBC spectrum of vulgarisin I (3)
- Fig. S23**  $^1\text{H}$ - $^1\text{H}$  COSY spectrum of vulgarisin I (3)
- Fig. S24** NOESY spectrum of vulgarisin I (3)
- Fig. S25** UV and CD spectra (experimental and calculated) of vulgarisin I (3)
- Fig. S26** MS and MS<sup>2</sup> spectra of vulgarisin I (3)
- Fig. S27** FT-IR spectrum of vulgarisin I (3)
- Fig. S28**  $^1\text{H}$  NMR spectrum of vulgarisin J (4)

**Fig. S29**  $^{13}\text{C}$  NMR spectrum of vulgarisin J (4)

**Fig. S30** HSQC spectrum of vulgarisin J (4)

**Fig. S31** HMBC spectrum of vulgarisin J (4)

**Fig. S32**  $^1\text{H}$ - $^1\text{H}$  COSY spectrum of vulgarisin J (4)

**Fig. S33** NOESY spectrum of vulgarisin J (4)

**Fig. S34** UV and CD spectra (experimental and calculated) of vulgarisin J (4)

**Fig. S35** MS and MS<sup>2</sup> spectra of vulgarisin J (4)

**Fig. S36** FT-IR spectrum of vulgarisin J (4)

**Fig. S37**  $^1\text{H}$  NMR spectrum of vulgarisin K (5)

**Fig. S38**  $^{13}\text{C}$  NMR spectrum of vulgarisin K (5)

**Fig. S39** HSQC spectrum of vulgarisin K (5)

**Fig. S40** HMBC spectrum of vulgarisin K (5)

**Fig. S41**  $^1\text{H}$ - $^1\text{H}$  COSY spectrum of vulgarisin K (5)

**Fig. S42** NOESY spectrum of vulgarisin K (5)

**Fig. S43** UV and CD spectra (experimental and calculated) of vulgarisin K (5)

**Fig. S44** MS and MS<sup>2</sup> spectra of vulgarisin K (5)

**Fig. S45** FT-IR spectrum of vulgarisin K (5)

**Fig. S46**  $^1\text{H}$  NMR spectrum of vulgarisin L (6)

**Fig. S47**  $^{13}\text{C}$  NMR spectrum of vulgarisin L (6)

**Fig. S48** HSQC spectrum of vulgarisin L (6)

**Fig. S49** HMBC spectrum of vulgarisin L (6)

**Fig. S50**  $^1\text{H}$ - $^1\text{H}$  COSY spectrum of vulgarisin L (6)

**Fig. S51** NOESY spectrum of vulgarisin L (6)

**Fig. S52** UV and CD spectra (experimental and calculated) of vulgarisin L (6)

**Fig. S53** MS and MS<sup>2</sup> spectra of vulgarisin L (6)

**Fig. S54** FT-IR spectrum of vulgarisin L (6)

**Fig. S55** HPLC chromatogram of reference standard caffeic acid

**Fig. S56** HPLC chromatogram of reference standard rutin

**Fig. S57** HPLC chromatogram of reference standard rosmarinic acid

**Fig. S58** HPLC chromatogram of isolated reference compound vulgarism F (8)

**Fig. S59** HPLC chromatogram of isolated reference compound vulgarism I (3)

**Fig. S60** HPLC chromatogram of isolated reference compound vulgarism E (7)

**Fig. S61** HPLC chromatogram of isolated reference compound vulgarism C (11)

**Fig. S62** HPLC chromatogram of isolated reference compound vulgarism J (4)

**Fig. S63** HPLC chromatogram of isolated reference compound vulgarism B (12)

**Fig. S64** HPLC chromatogram of isolated reference compound vulgarism D (9)

**Fig. S65** HPLC chromatogram of isolated reference compound vulgarism G (1)

**Fig. S66** HPLC chromatogram of isolated reference compound vulgarism A (10)

**Fig. S67** HPLC chromatogram of isolated reference compound vulgarism K (5)

**Fig. S68** HPLC chromatogram of isolated reference compound vulgarism L (6)

**Fig. S69** HPLC chromatogram of isolated reference compound vulgarism H (2)

**Fig. S70** HPLC chromatogram of reference standard ursolic acid

**Fig. S71** HRMS spectrum of tentatively identified compound oleanolic acid (Mw=456)

**Fig. S72** HRMS spectrum of tentatively identified compound abietic acid (Mw=302)

**Fig. S73** HRMS spectrum of tentatively identified compound ursonic acid (Mw=454)

**Fig. S74** HRMS spectrum of tentatively identified compound betulinic acid (Mw=456)

**Fig. S75** HRMS spectrum of tentatively identified compound dehydrotrameternic acid (Mw=454)

**Table S1** Chemical profile of *P. vulgaris*



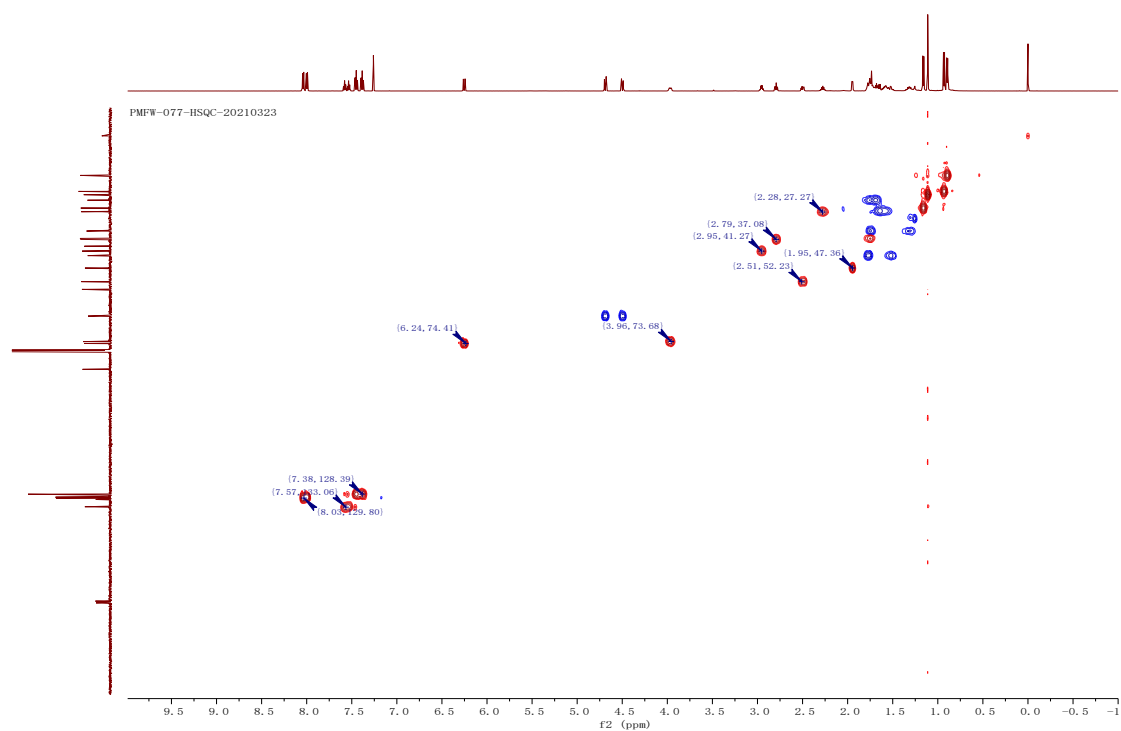

**Fig. S3** HSQC spectrum of vulgarisin G (1)

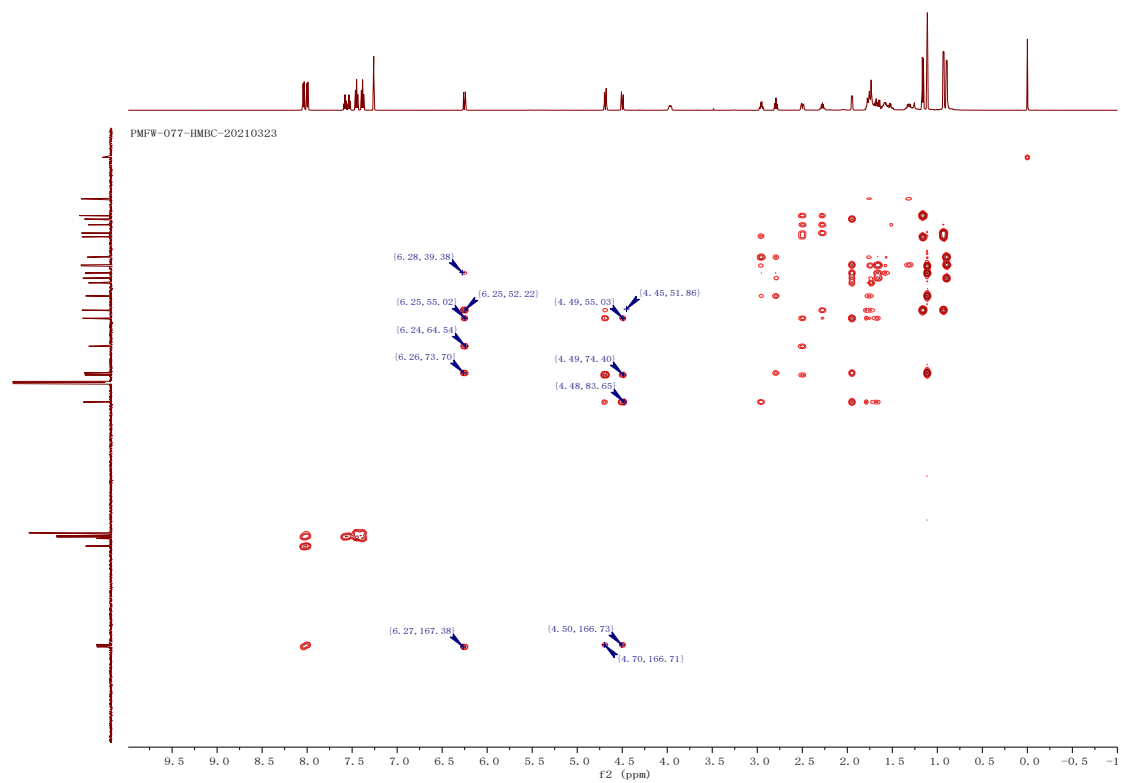

**Fig. S4** HMBC spectrum of vulgarisin G (1)

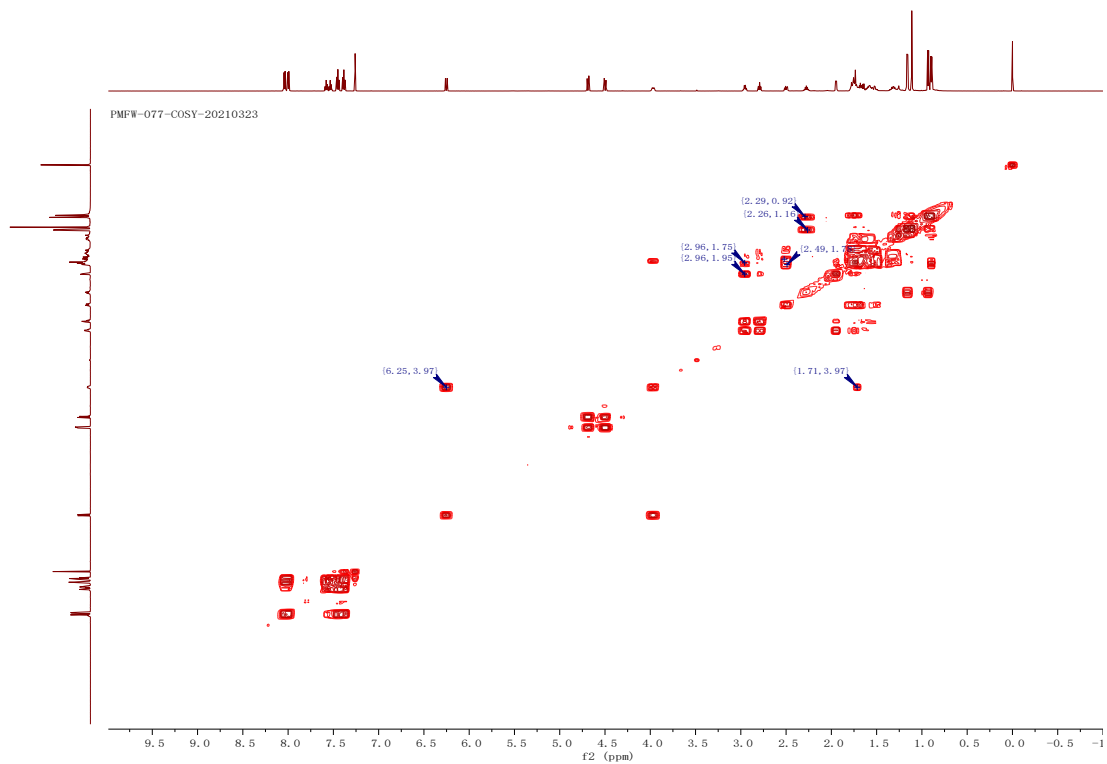

**Fig. S5**  $^1\text{H}$ - $^1\text{H}$  COSY spectrum of vulgarisin G (**1**)

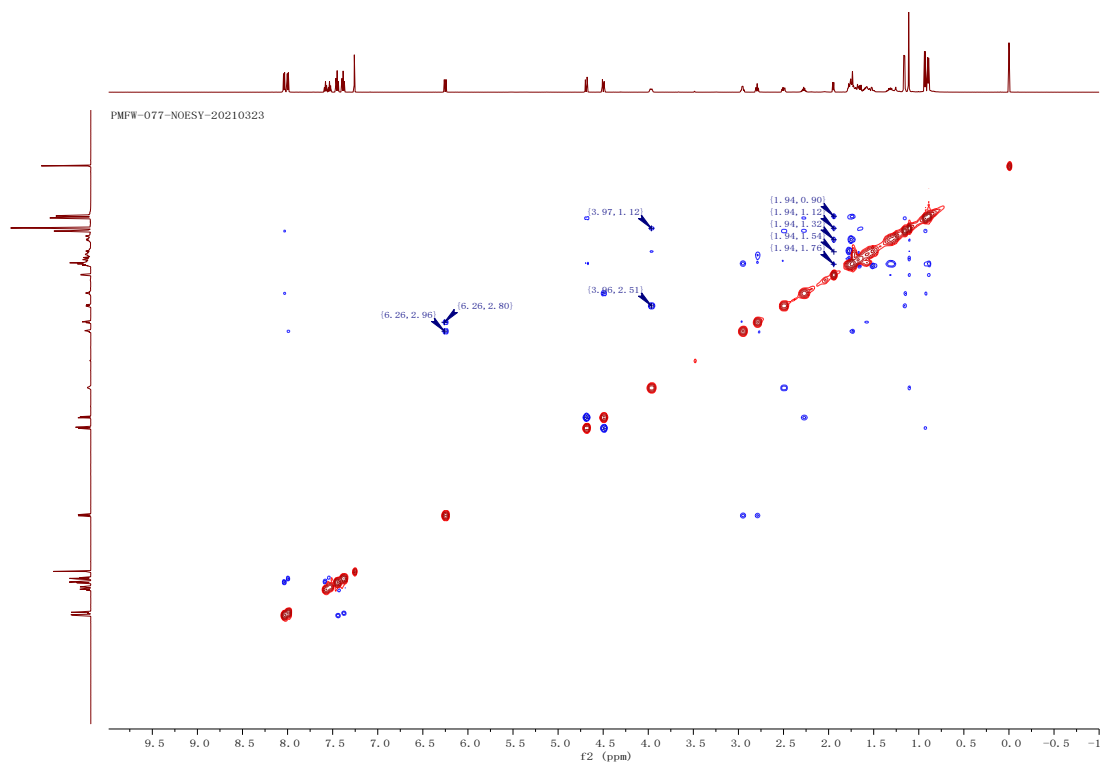

**Fig. S6** NOESY spectrum of vulgarisin G (**1**)

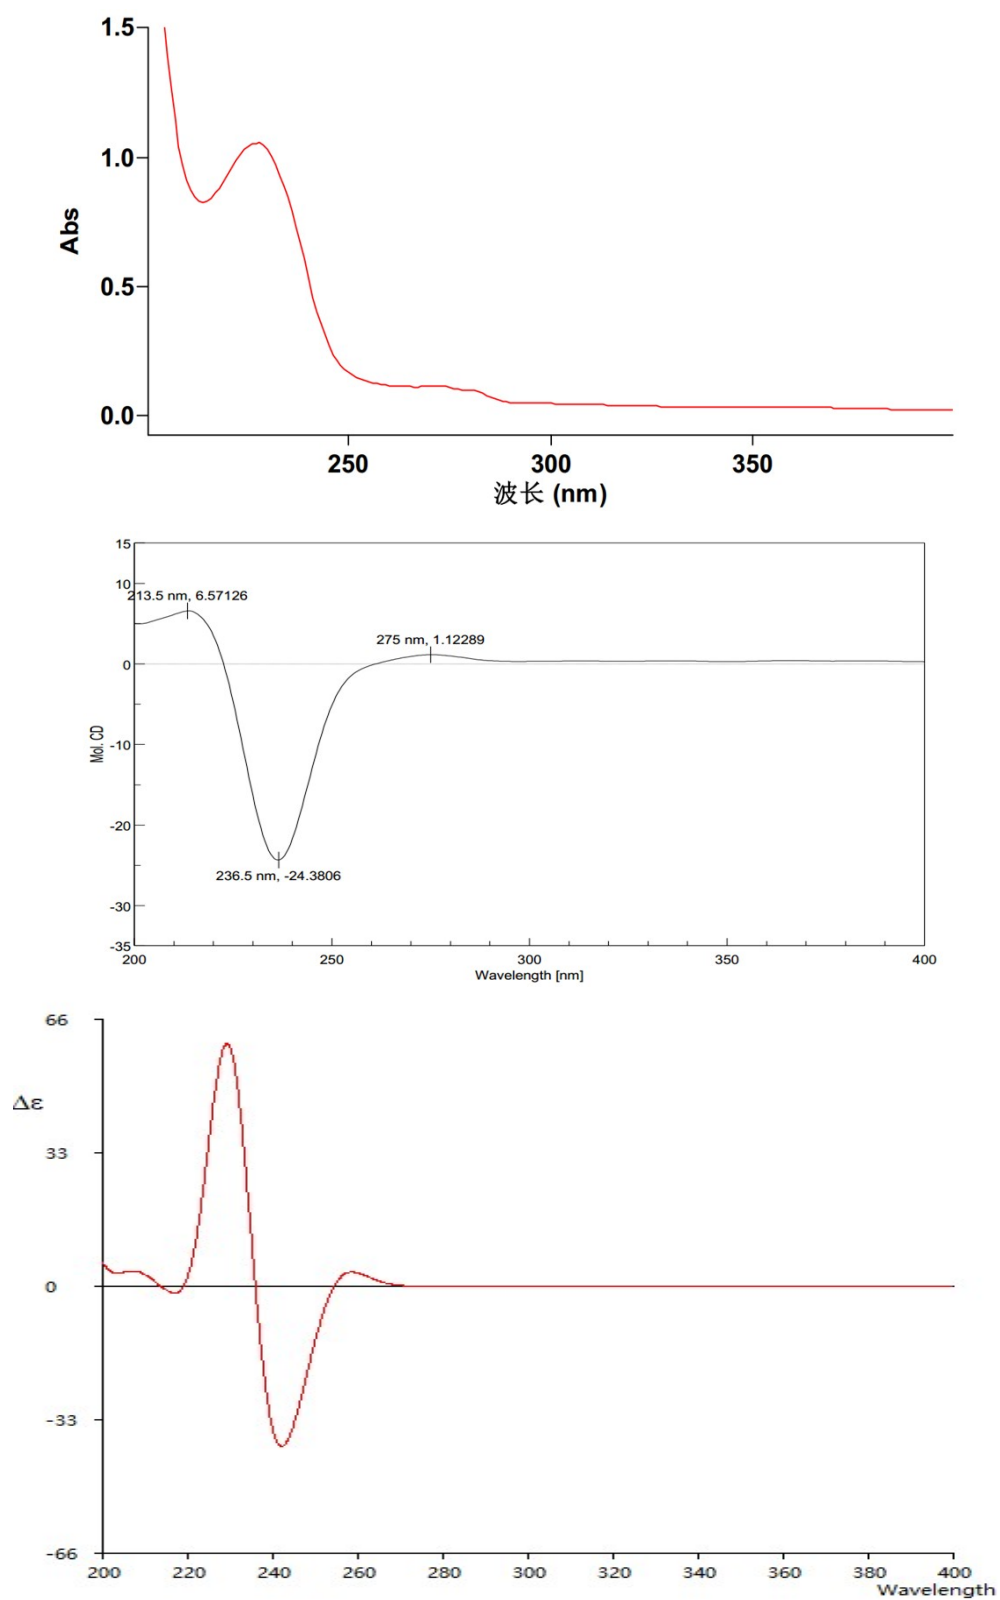

**Fig. S7** UV and CD spectra (experimental and calculated) of vulgarisin G (1)



PMFW077 #1 RT: 0.00 AV: 1 NL: 7.50E8  
T: FTMS + p ESI Full ms [100.0000-1500.0000]

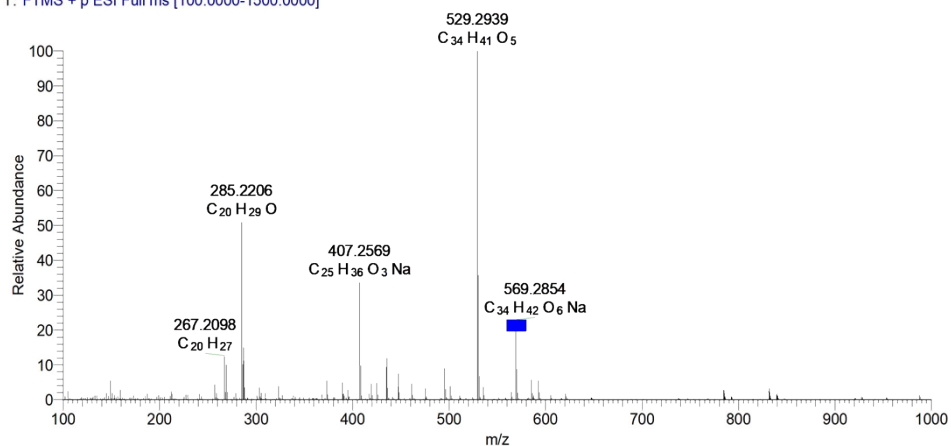

PMFW077\_210317145854 #1 RT: 0.00 AV: 1 NL: 1.38E6  
T: FTMS + p ESI Full ms2 569.3000@hcd25.00 [100.0000-600.0000]

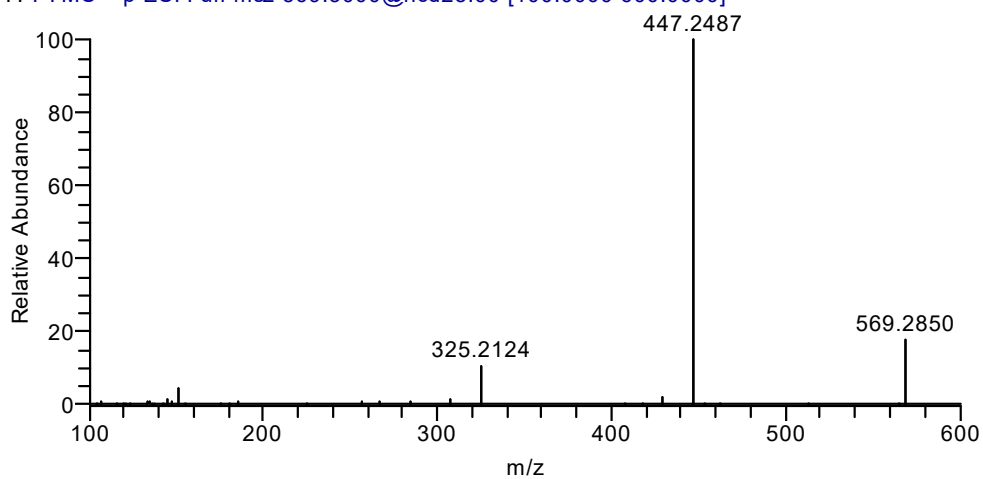

Fig. S8 MS and MS<sup>2</sup> spectra of vulgarisin G (1)

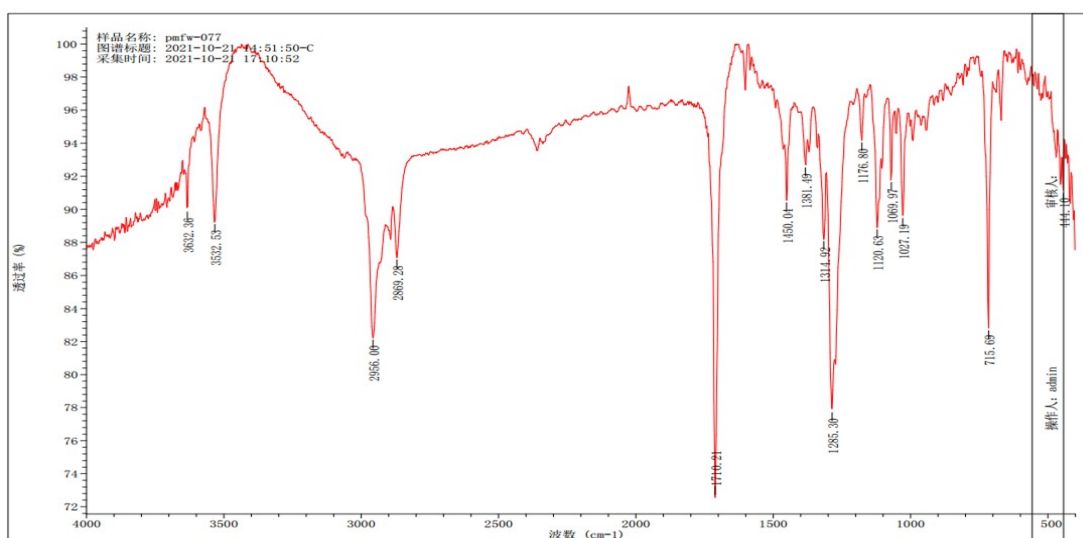

Fig. S9 FT-IR spectrum of vulgarisin G (1)

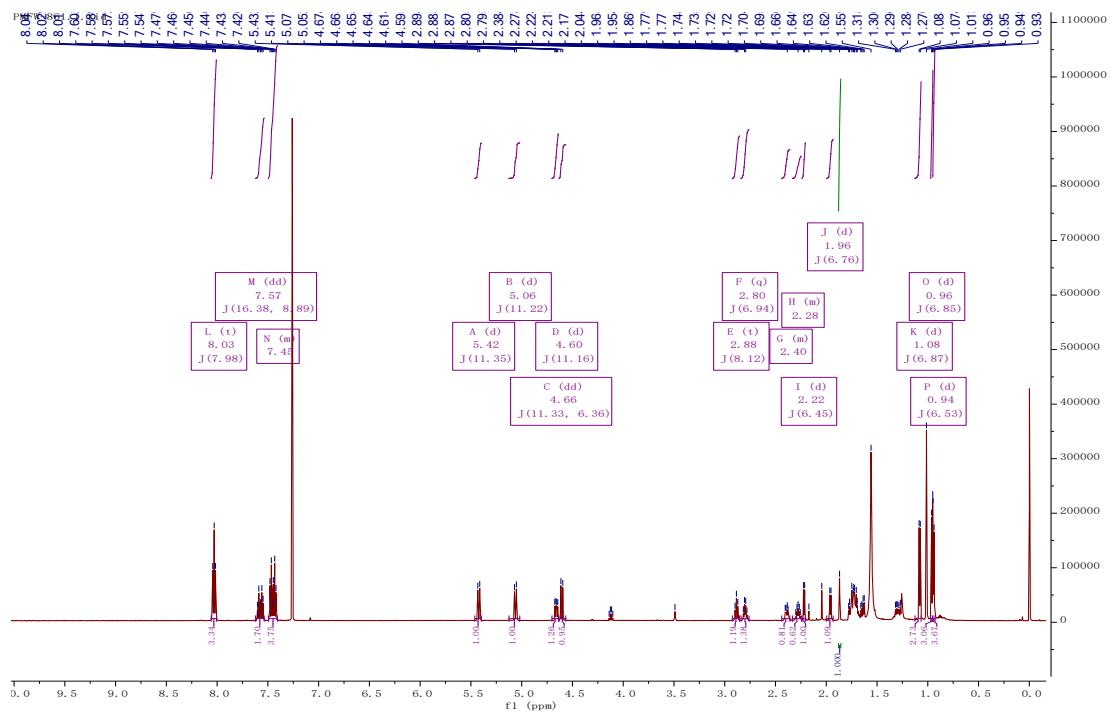

Fig. S10  $^1\text{H}$  NMR spectrum of vulgarisin H (2)

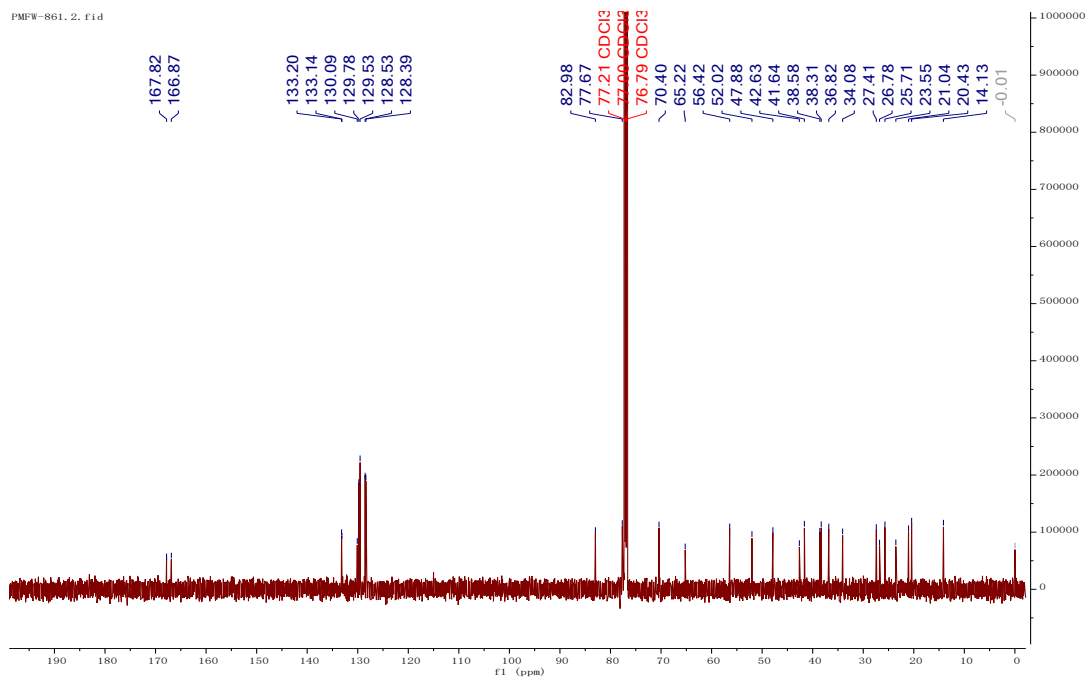

Fig. S11  $^{13}\text{C}$  NMR spectrum of vulgarisin H (2)

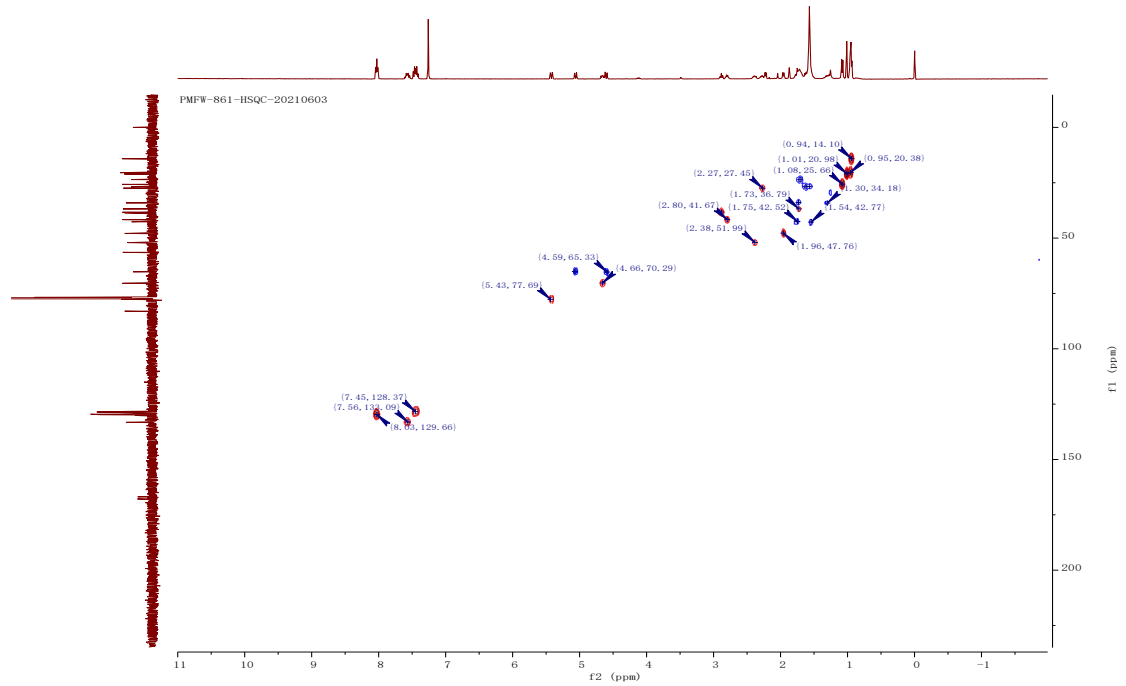

**Fig. S12** HSQC spectrum of vulgarisin H (2)

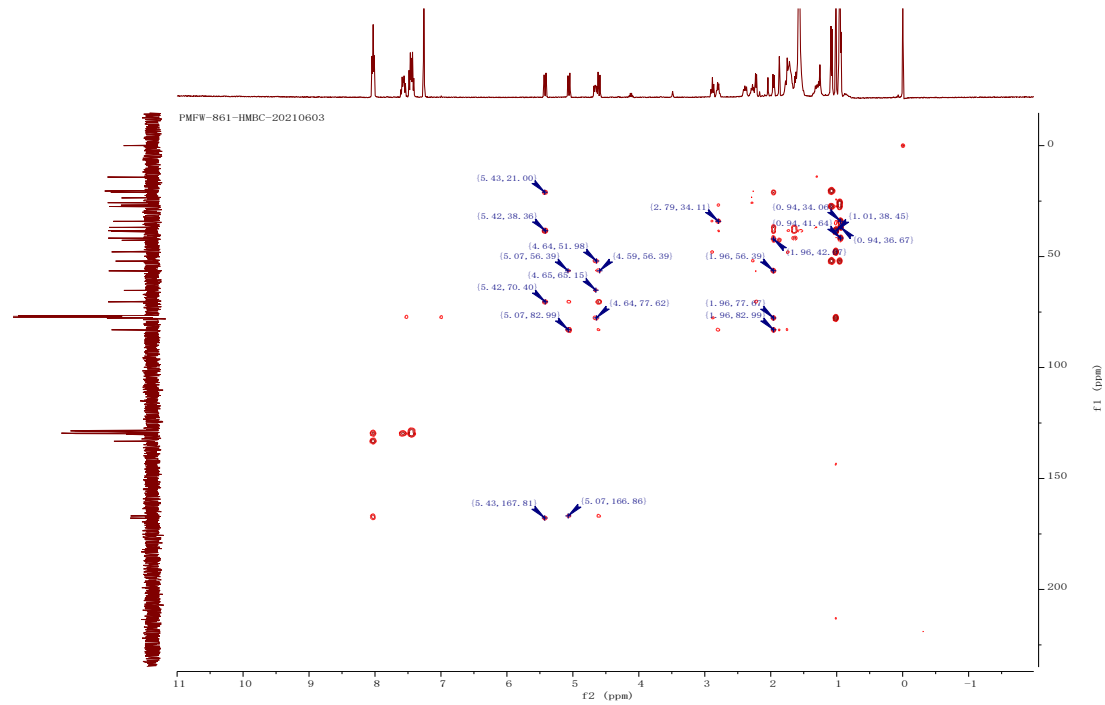

**Fig. S13** HMBC spectrum of vulgarisin H (2)

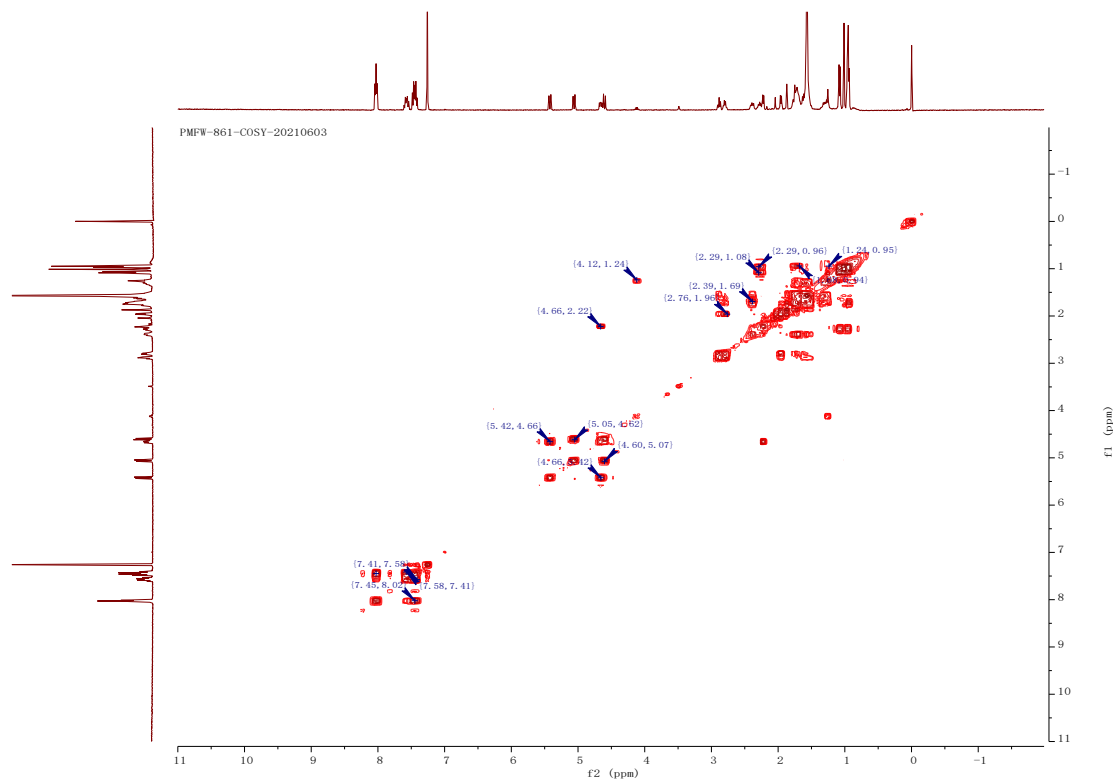

**Fig. S14**  $^1\text{H}$ - $^1\text{H}$  COSY spectrum of vulgarisin H (2)

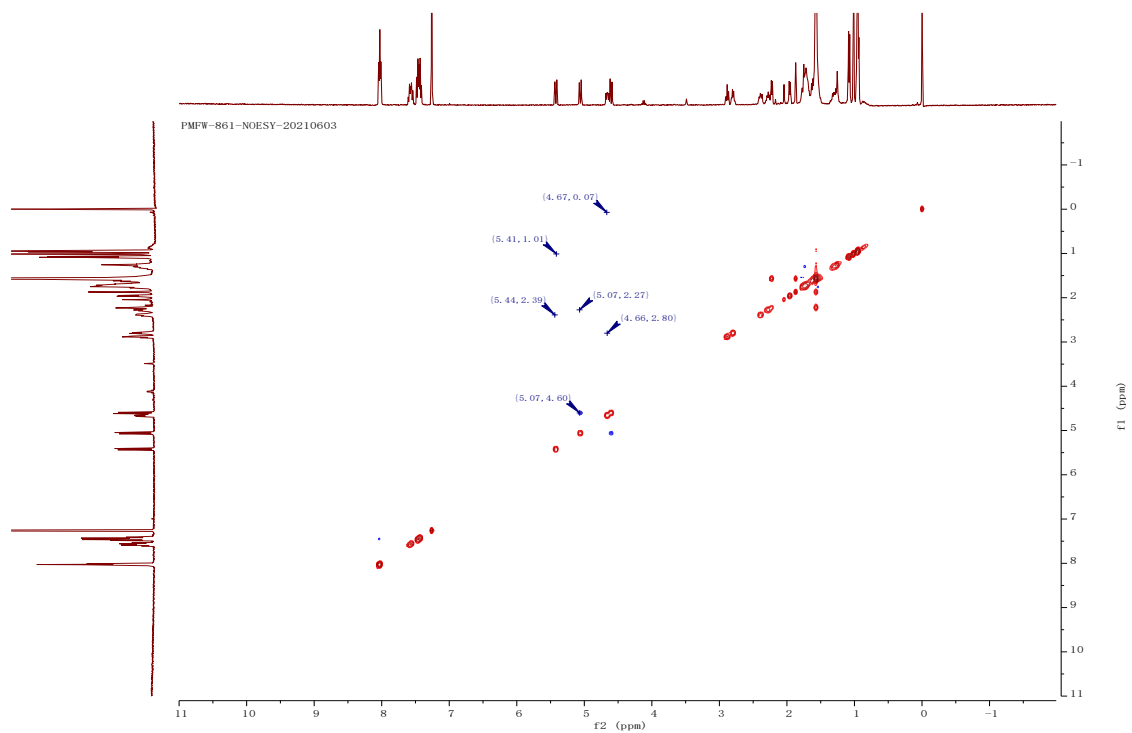

**Fig. S15** NOESY spectrum of vulgarisin H (2)

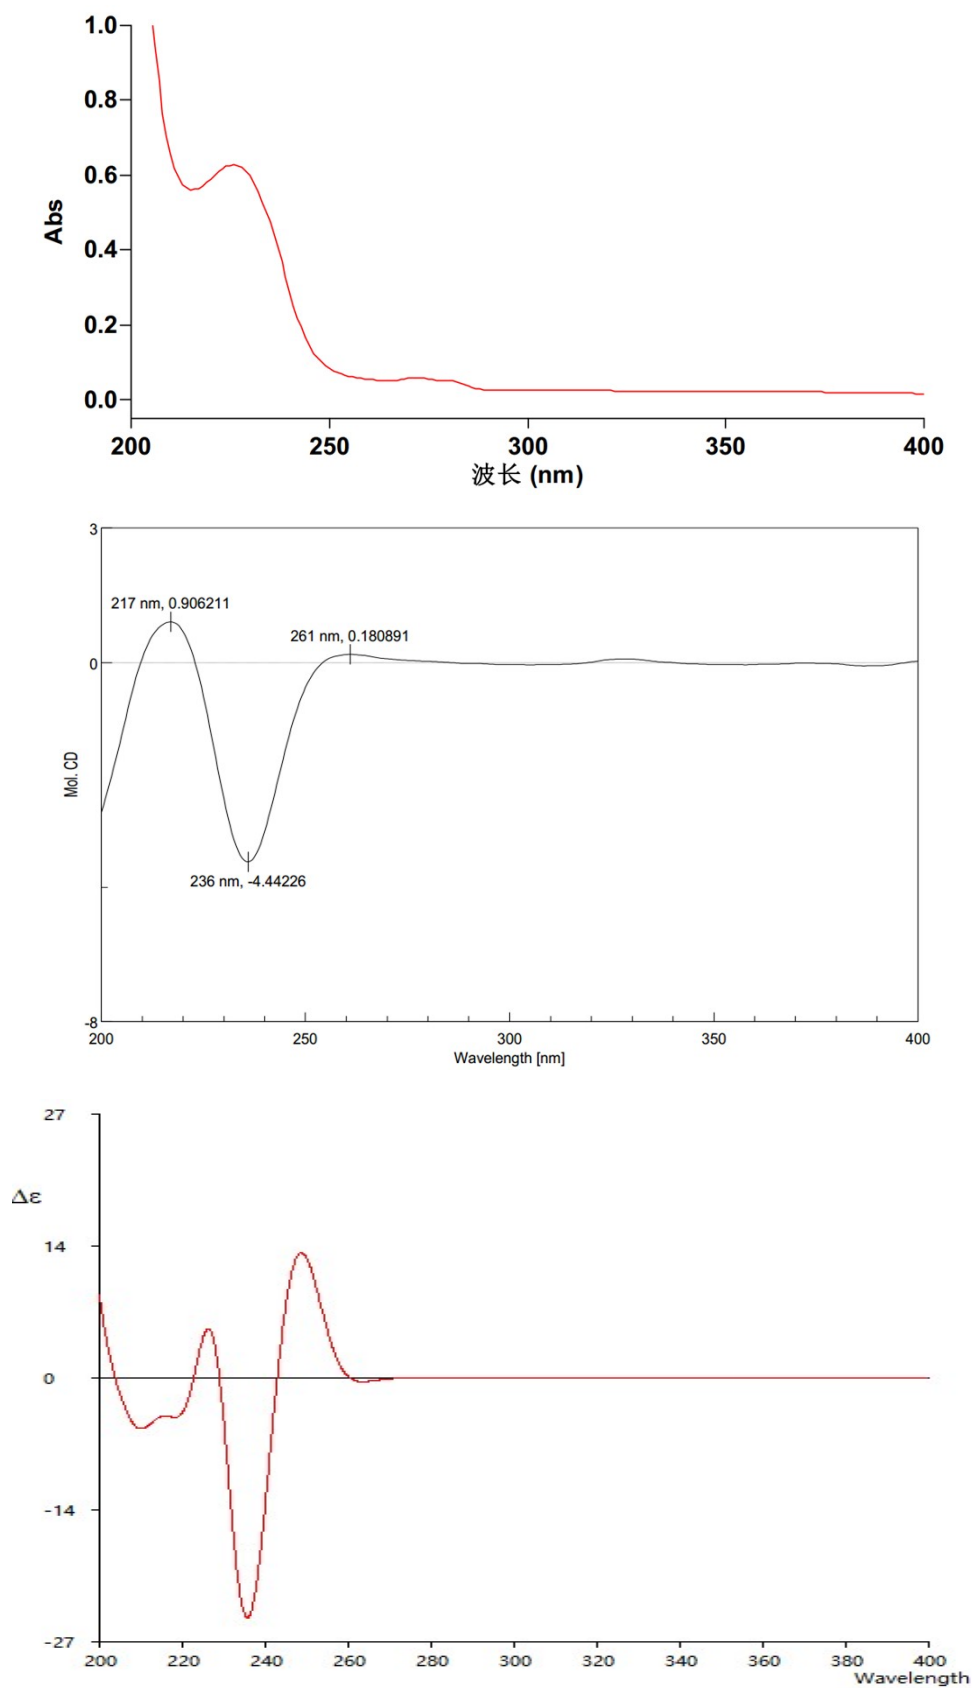

**Fig. S16** UV and CD spectra (experimental and calculated) of vulgarisin H (2)

PMFW-861 #1 RT: 0.00 AV: 1 NL: 6.26E8  
T: FTMS + p ESI Full ms [100.0000-1500.0000]

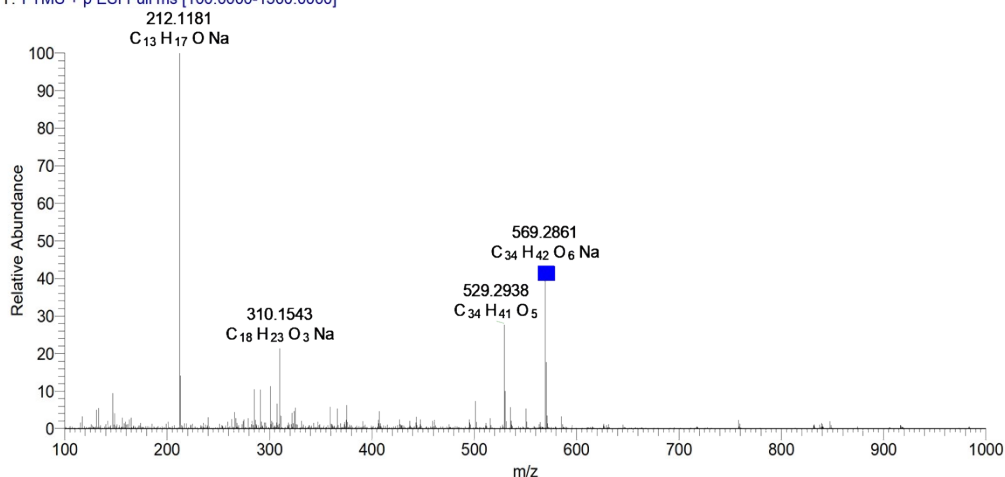

PMFW-861\_210602092934 #1 RT: 0.00 AV: 1 NL: 3.32E5  
T: FTMS + p ESI Full ms<sup>2</sup> 569.3000@hcd20.00 [50.0000-720.0000]

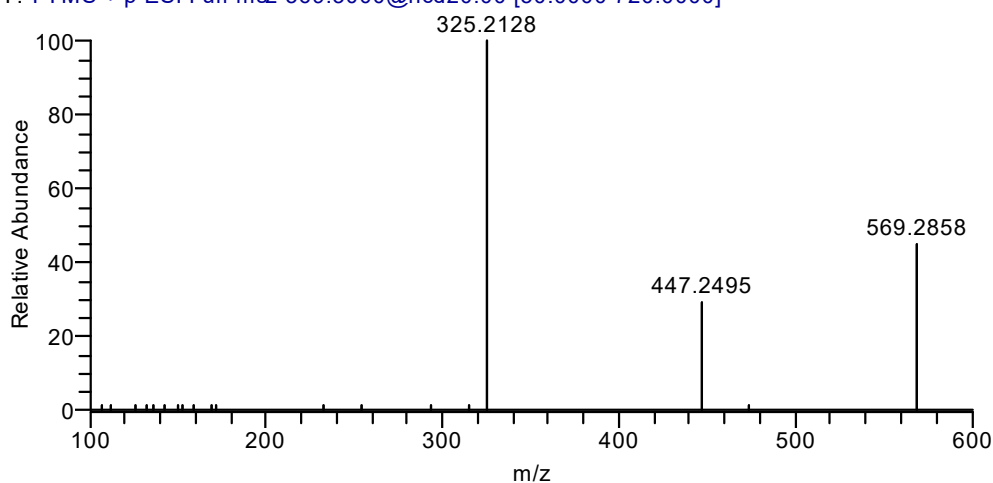

Fig. S17 MS and MS<sup>2</sup> spectra of vulgarisin H (2)

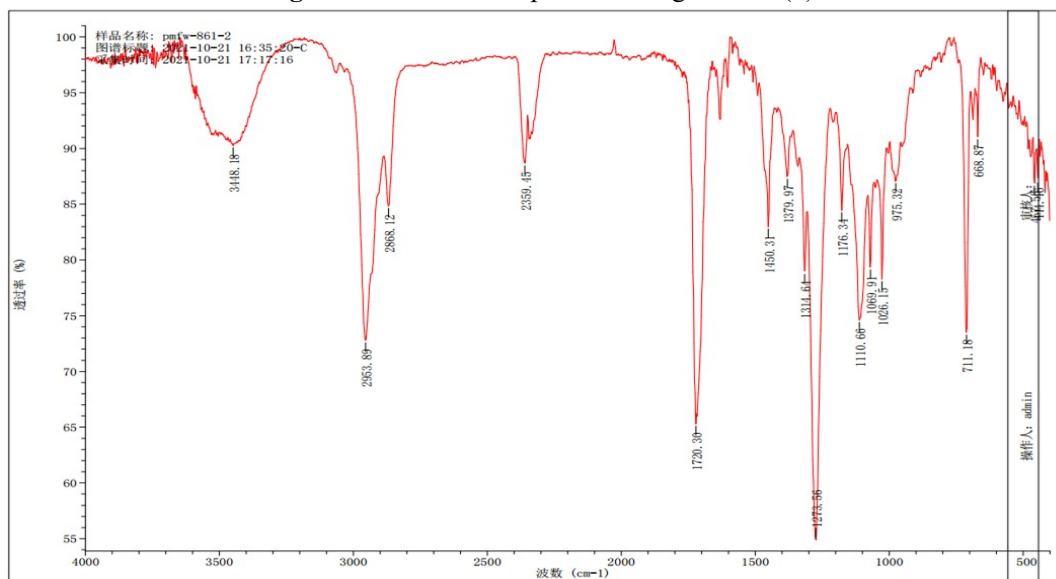

Fig. S18 FT-IR spectrum of vulgarisin H (2)

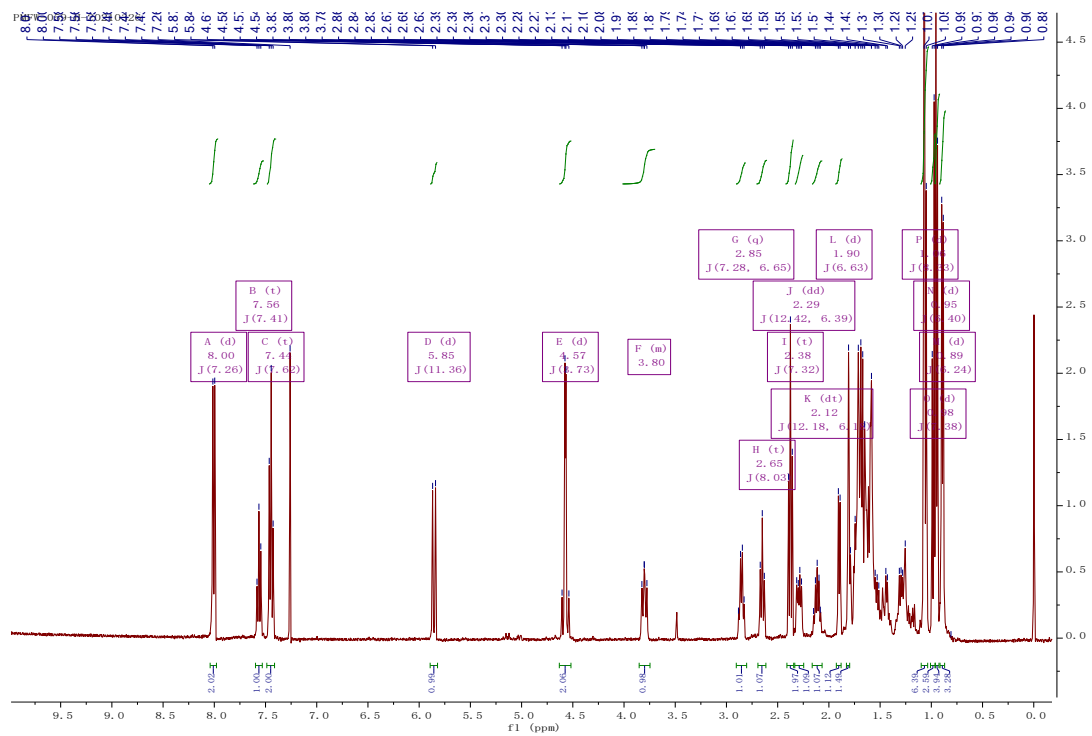

**Fig. S19** <sup>1</sup>H NMR spectrum of vulgarisin I (**3**)

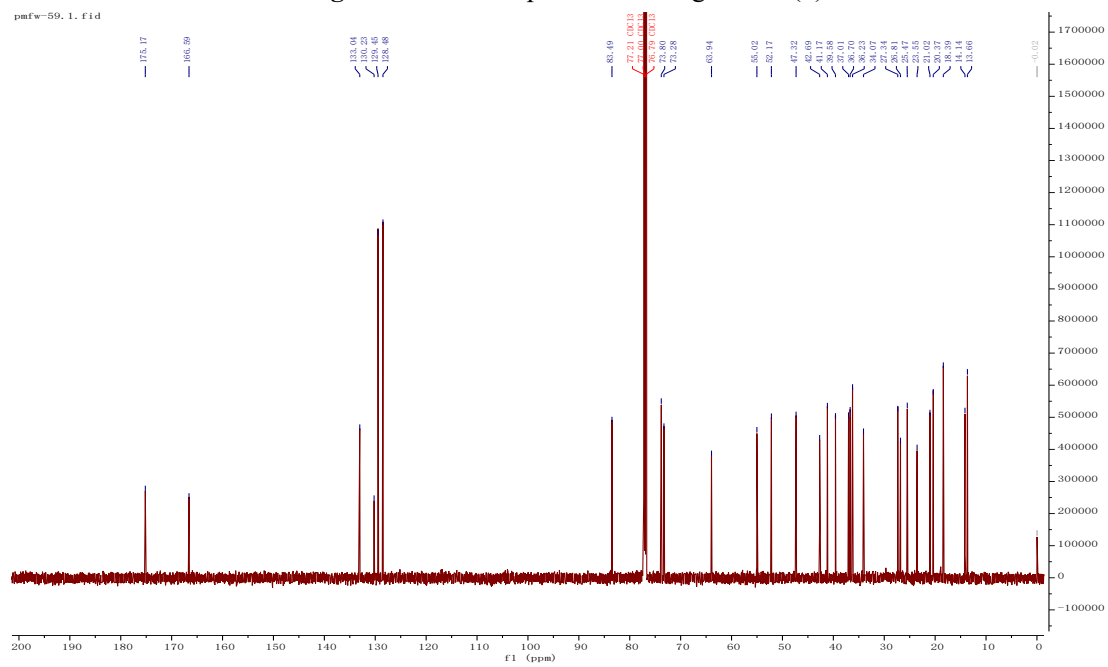

**Fig. S20** <sup>13</sup>C NMR spectrum of vulgarisin I (**3**)

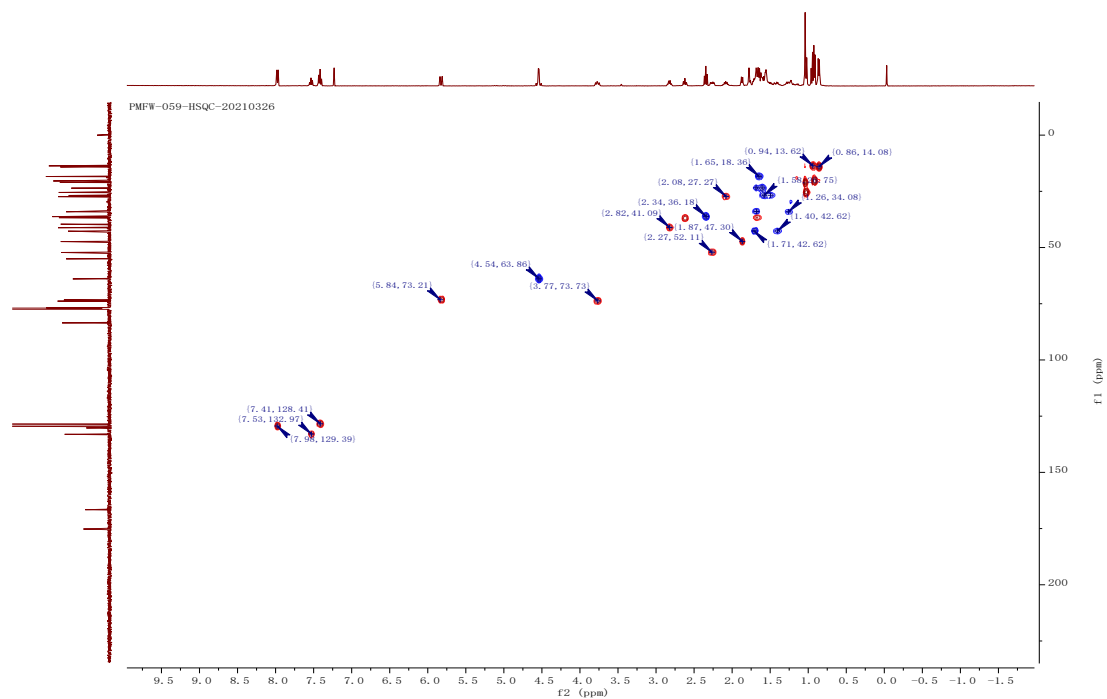

**Fig. S21** HSQC spectrum of vulgarisin I (3)

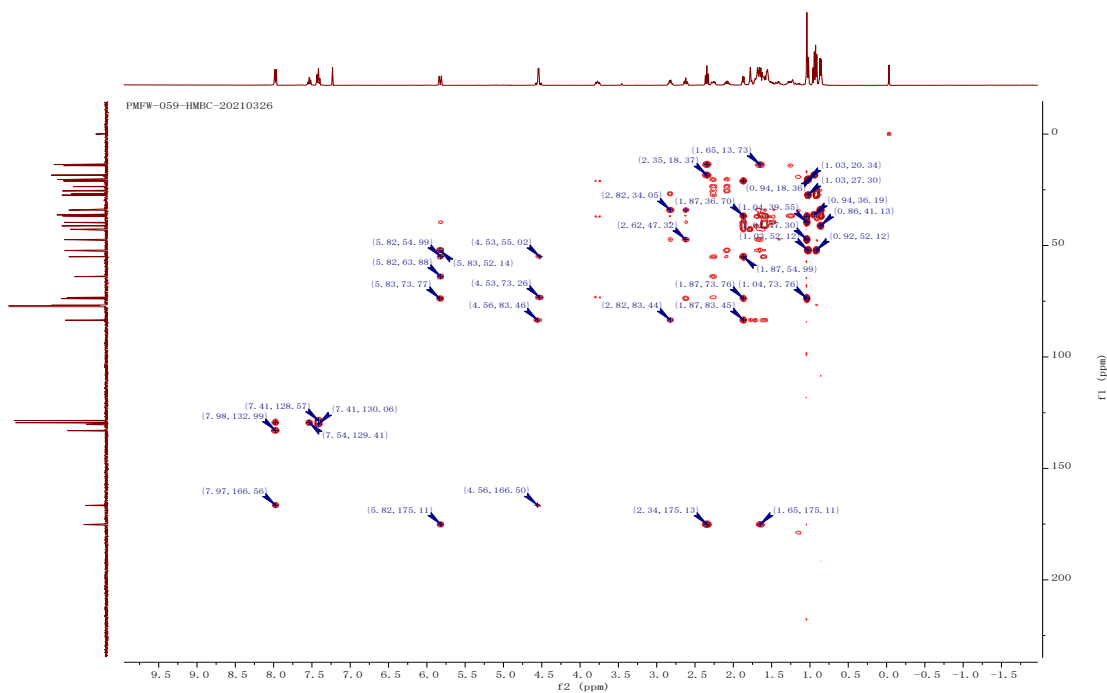

**Fig. S22** HMBC spectrum of vulgarisin I (3)



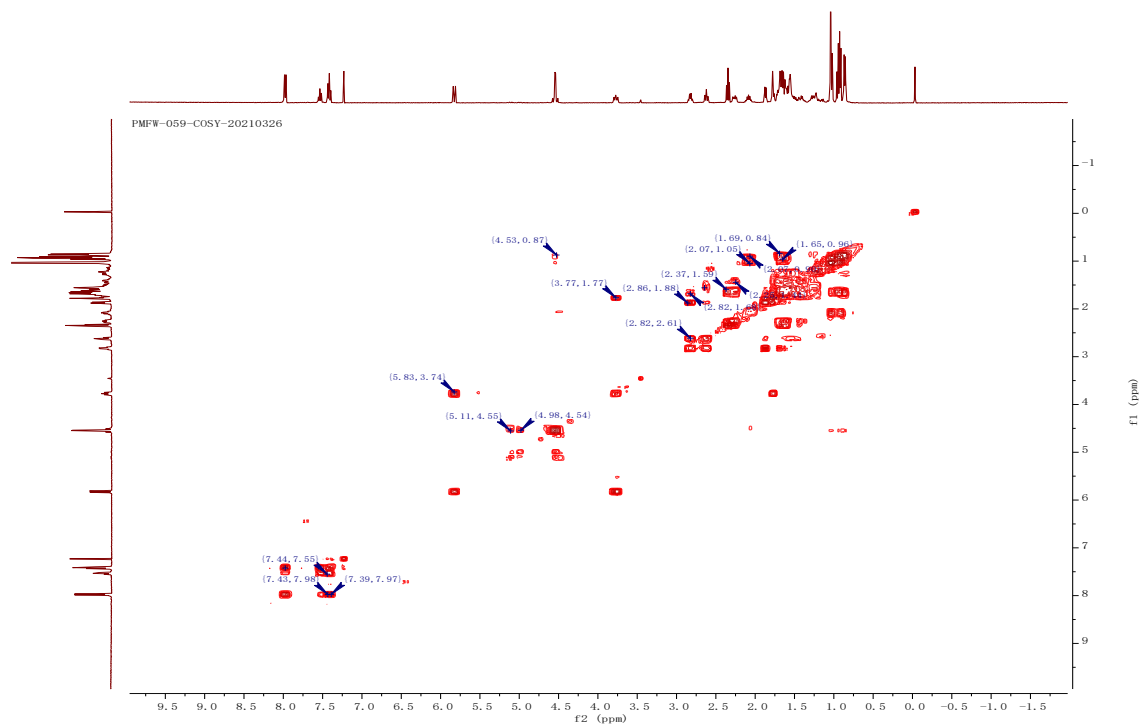

**Fig. S23**  $^1\text{H}$ - $^1\text{H}$  COSY spectrum of vulgarisin I (3)

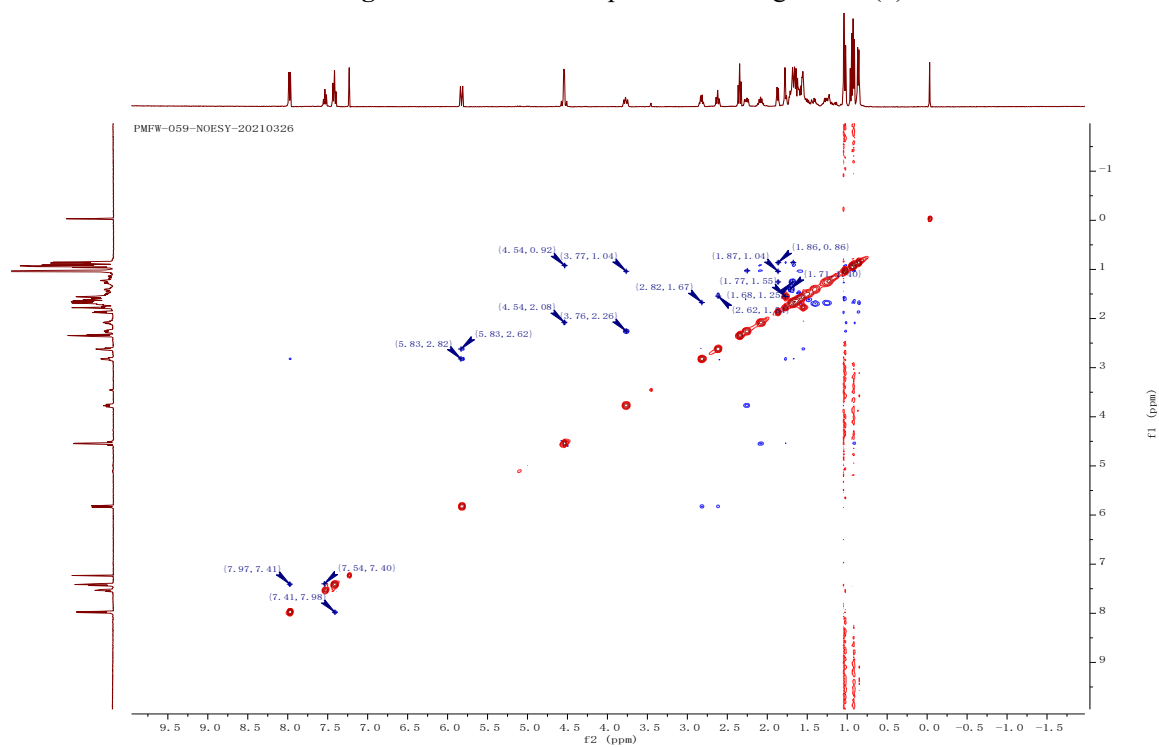

**Fig. S24** NOESY spectrum of vulgarisin I (3)

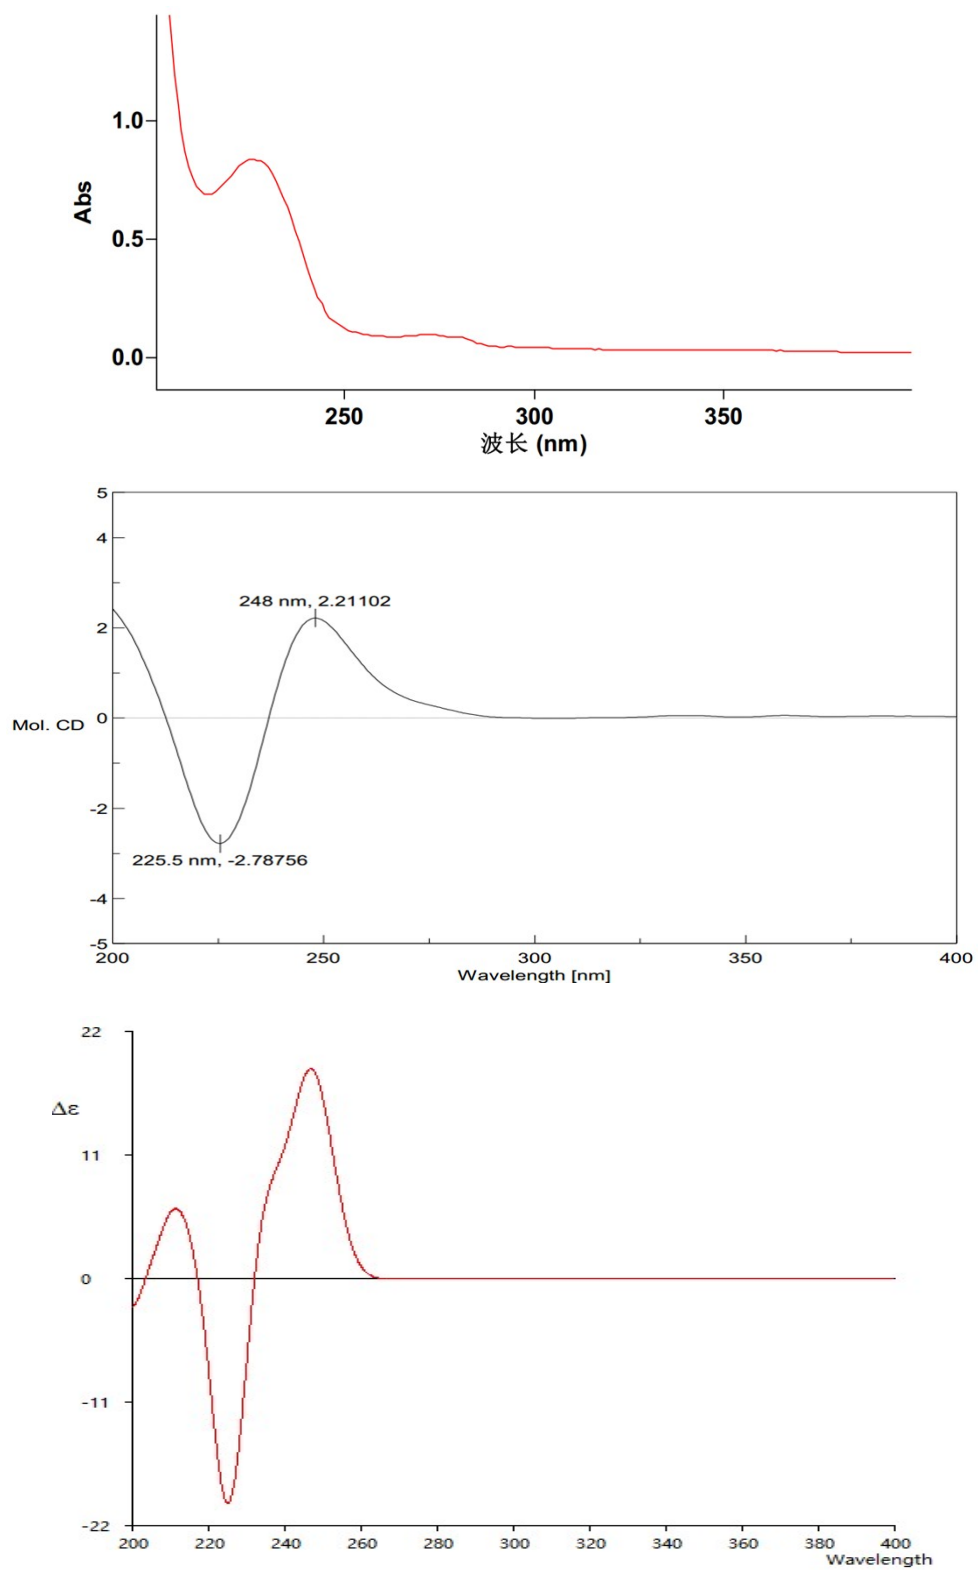

**Fig. S25** UV and CD spectra (experimental and calculated) of vulgarisin I (**3**)

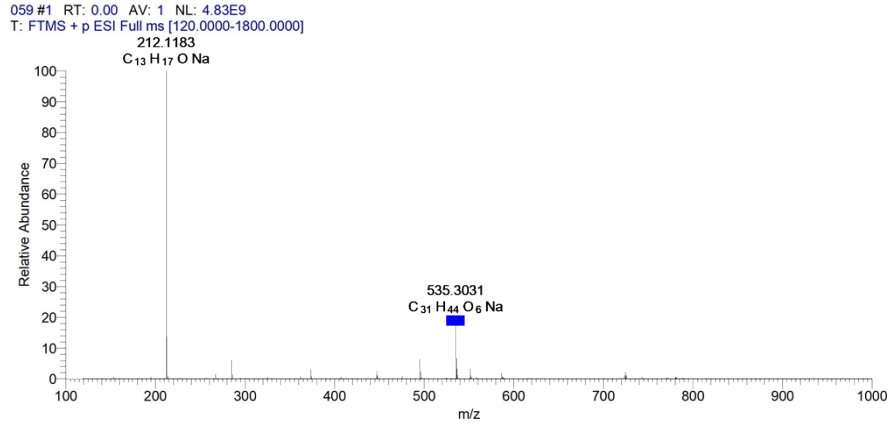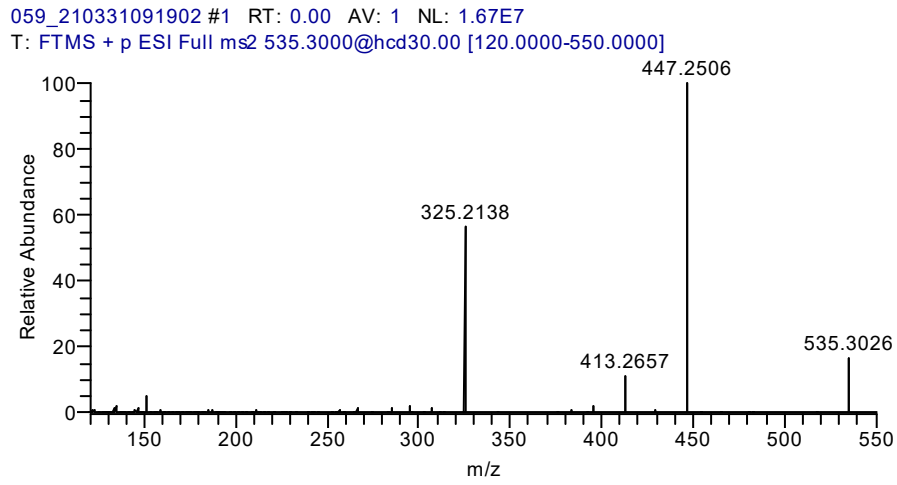

**Fig. S26** MS and MS<sup>2</sup> spectra of vulgarisin I (**3**)

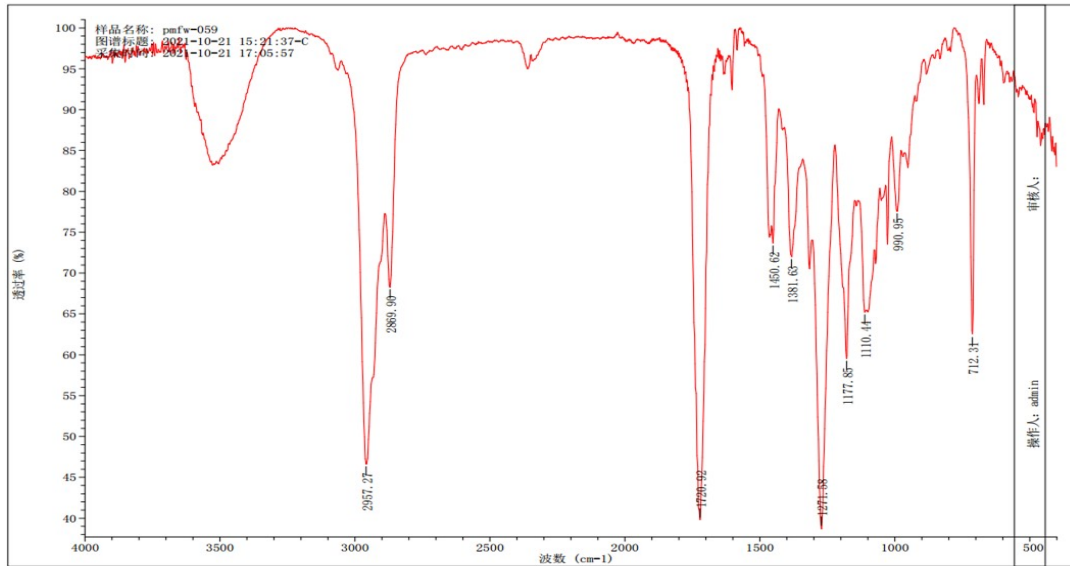

**Fig. S27** FT-IR spectrum of vulgarisin I (**3**)

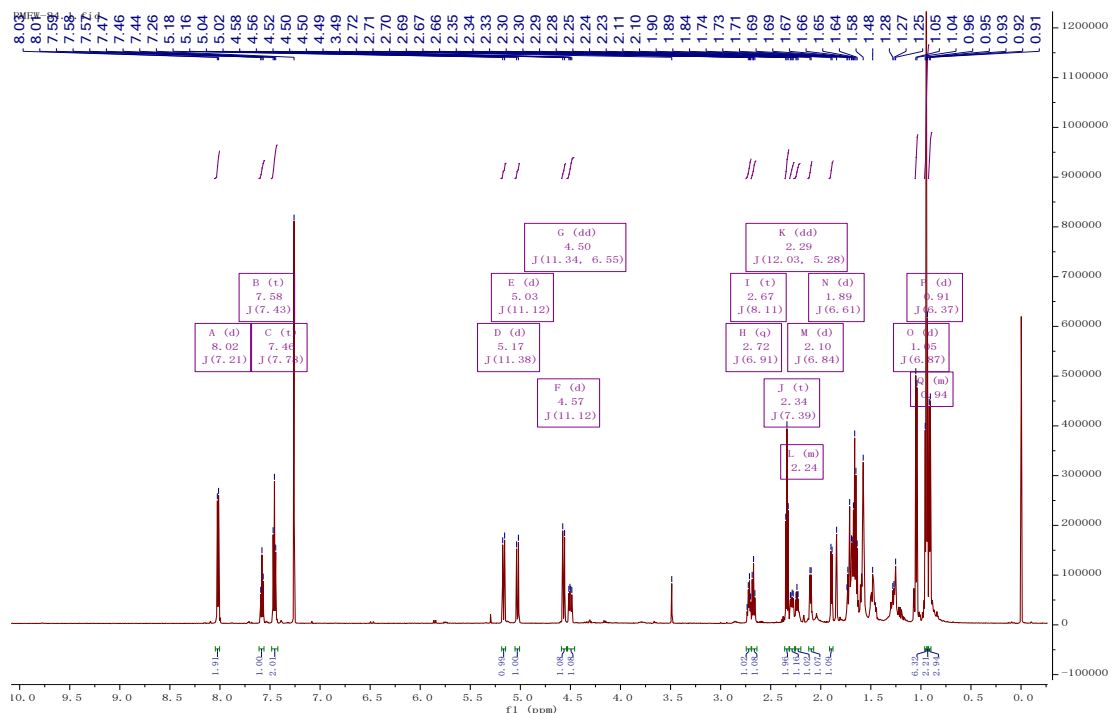

**Fig. S28** <sup>1</sup>H NMR spectrum of vulgarisin J (4)

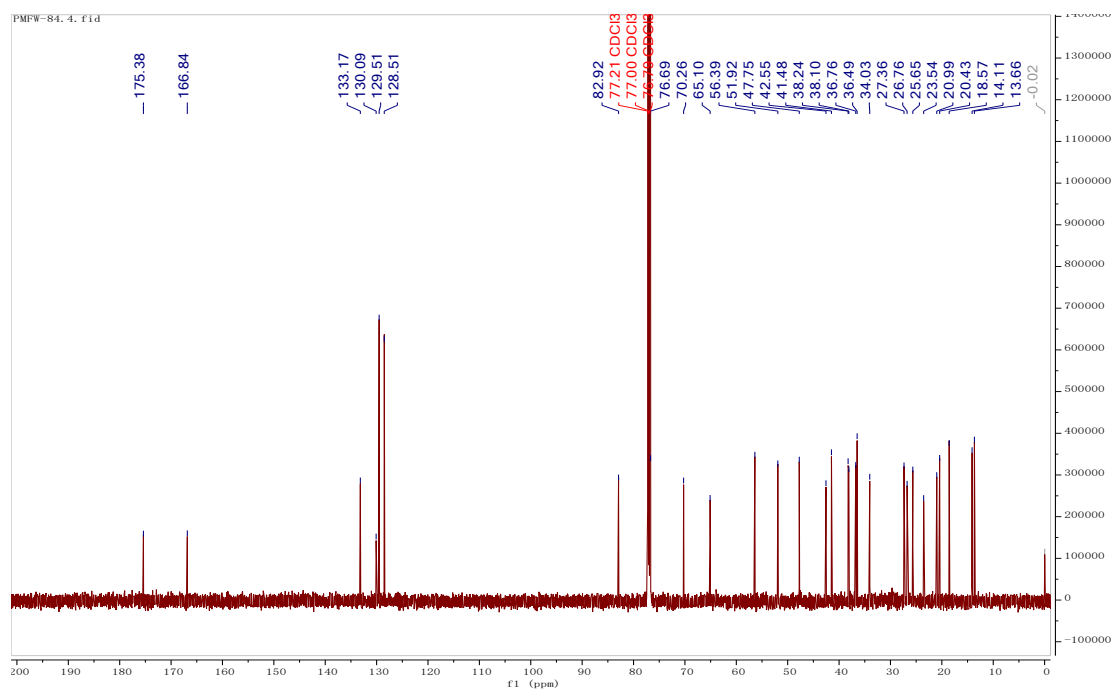

**Fig. S29** <sup>13</sup>C NMR spectrum of vulgarisin J (4)

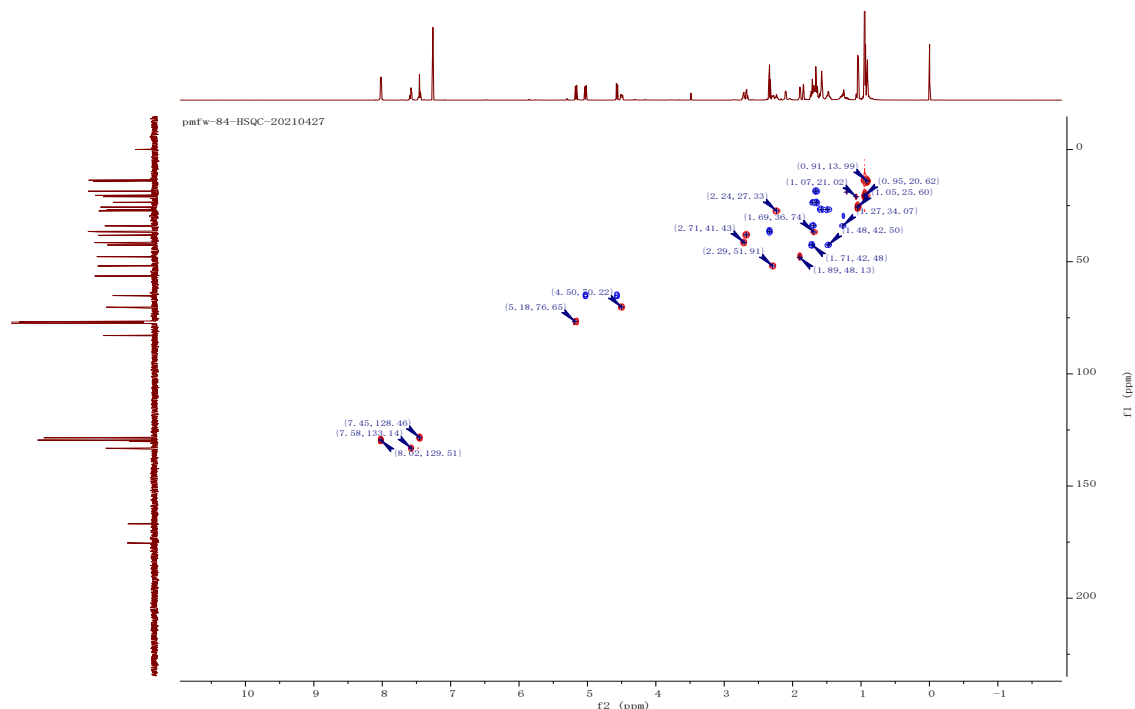

**Fig. S30** HSQC spectrum of vulgarisin J (4)

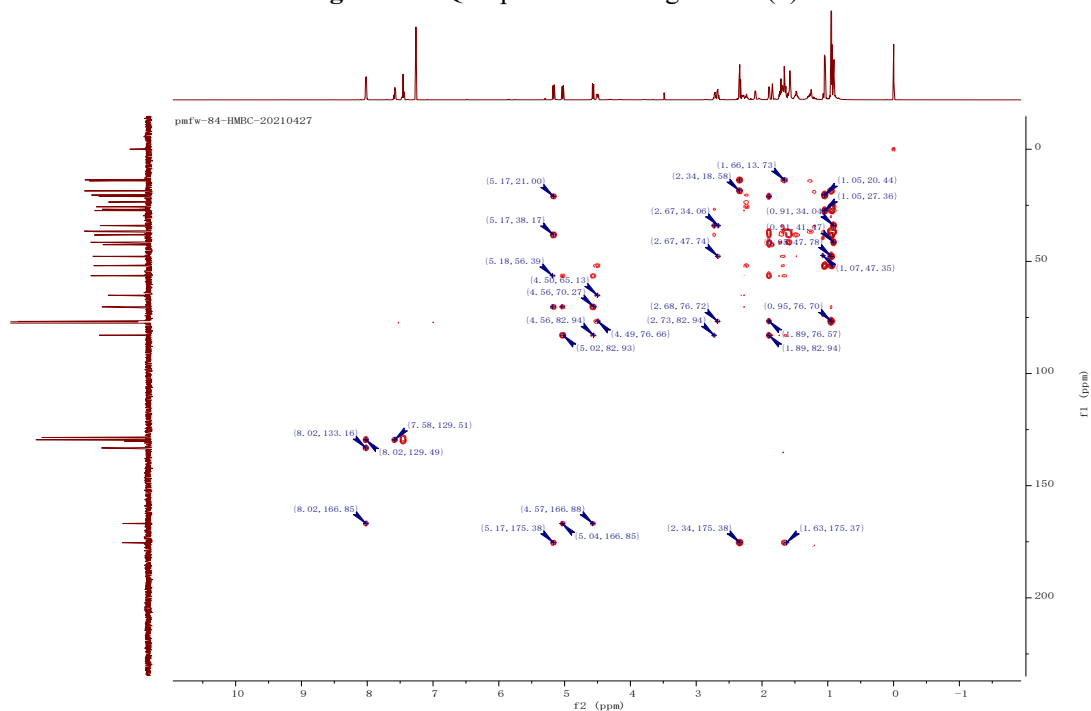

**Fig. S31** HMBC spectrum of vulgarisin J (4)

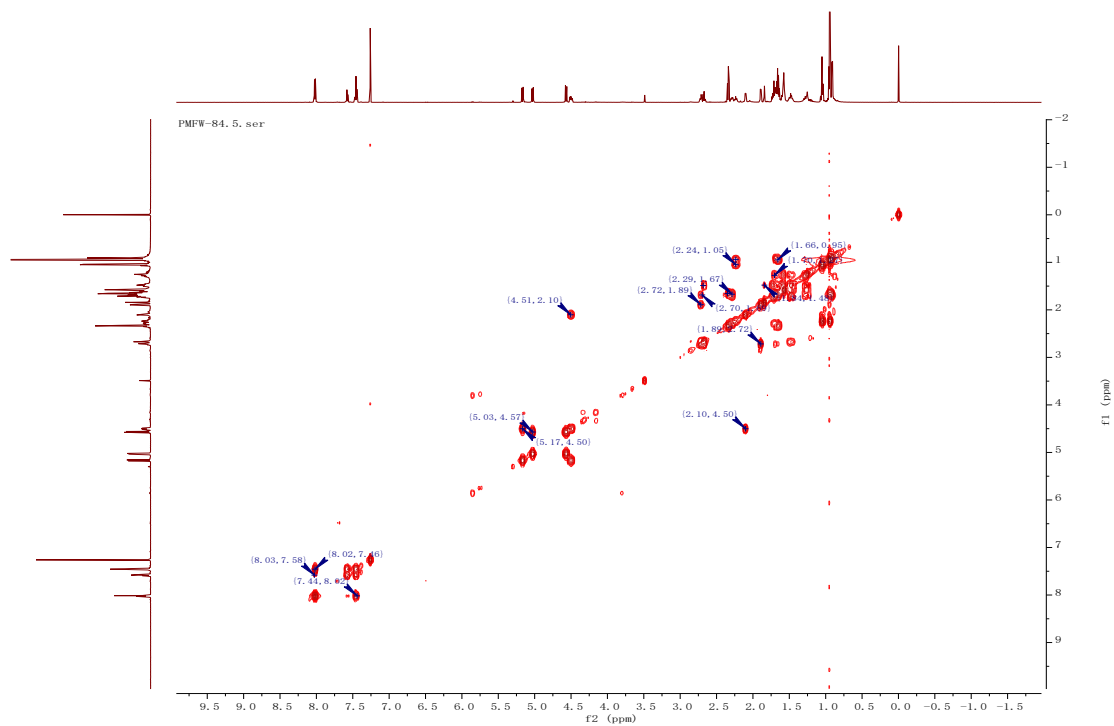

**Fig. S32**  $^1\text{H}$ - $^1\text{H}$  COSY spectrum of vulgarisin J (4)

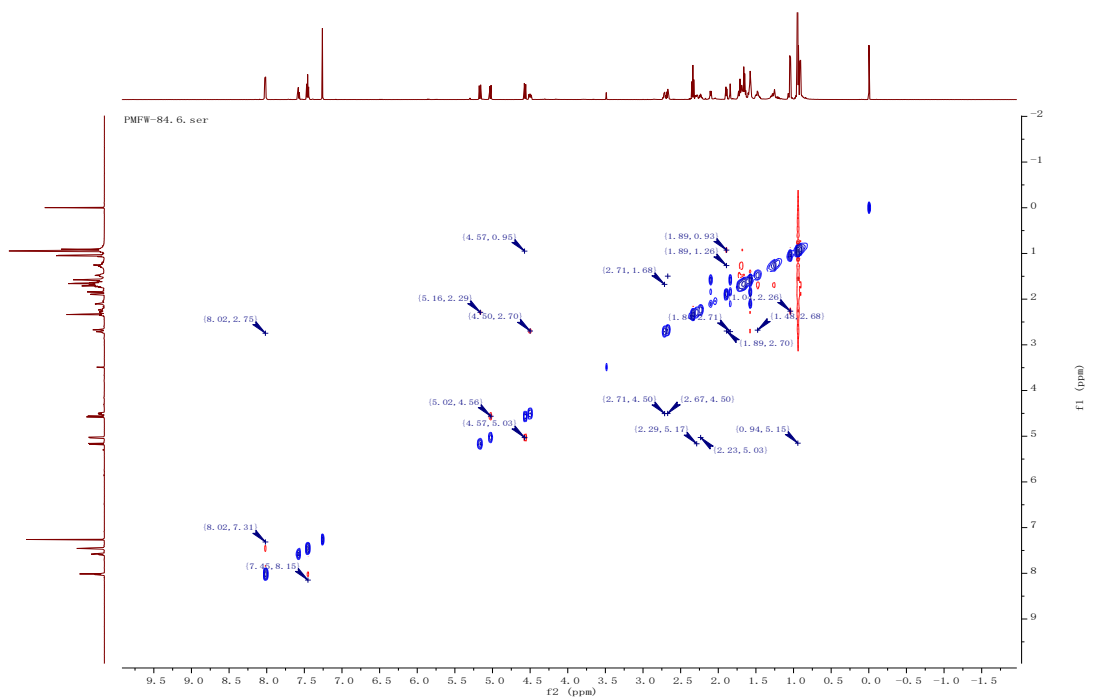

**Fig. S33** NOESY spectrum of vulgarisin J (4)

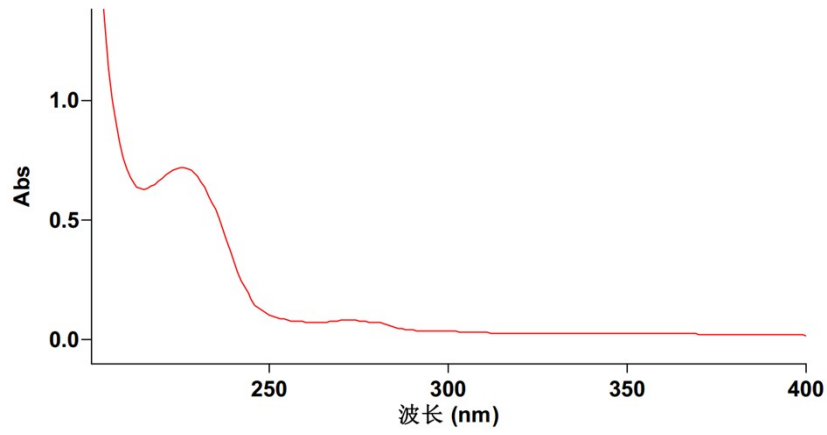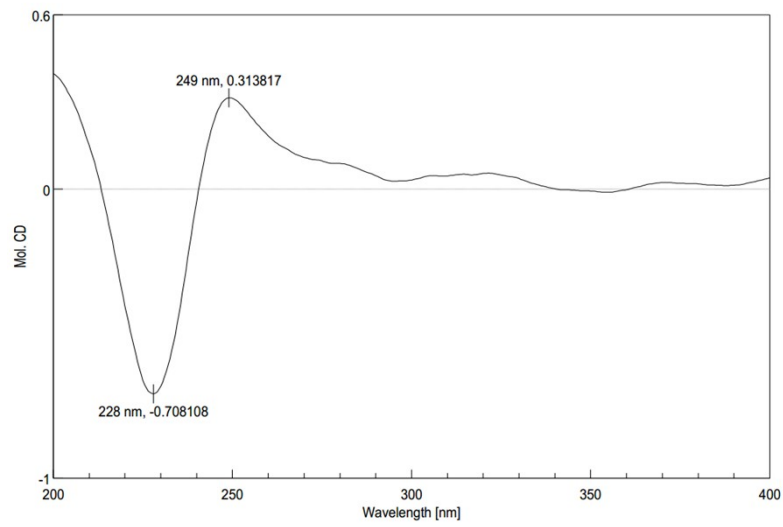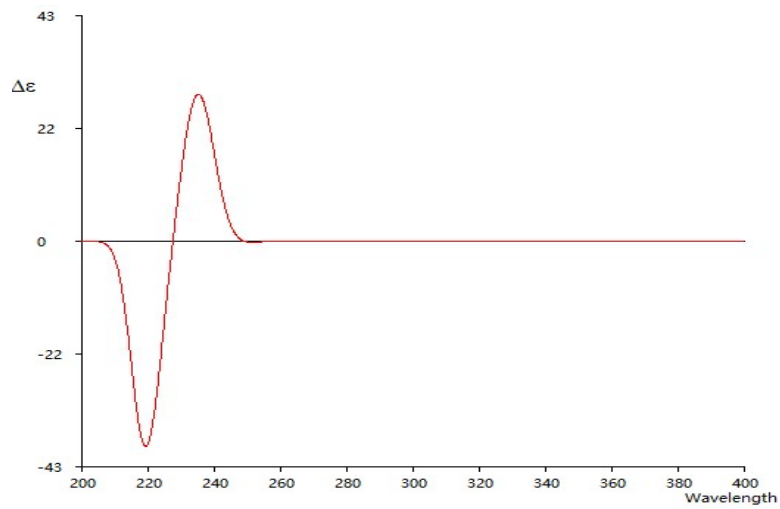

**Fig. S34** UV and CD spectra (experimental and calculated) of vulgarisin J (4)

PMFW084 #1 RT: 0.00 AV: 1 NL: 2.02E9  
T: FTMS + p ESI Full ms [166.7000-2500.0000]

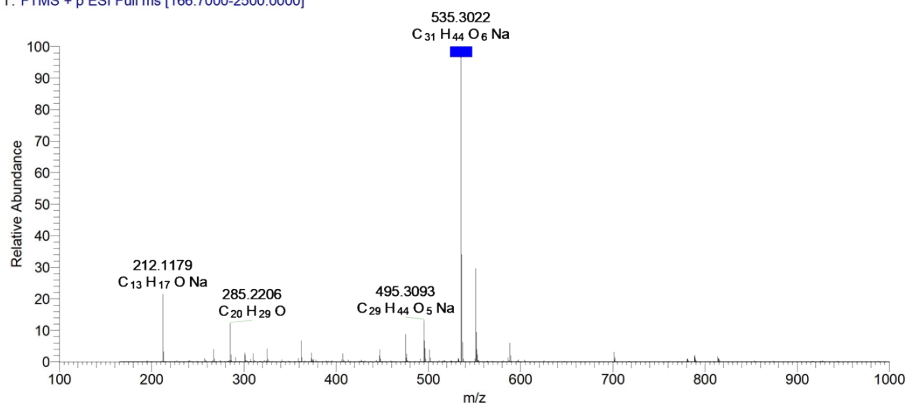

PMFW084\_MS210428-20eV #1 RT: 0.00 AV: 1 NL: 1.41E7  
T: FTMS + p ESI Full ms<sup>2</sup> 535.3000@hcd20.00 [50.0000-750.0000]

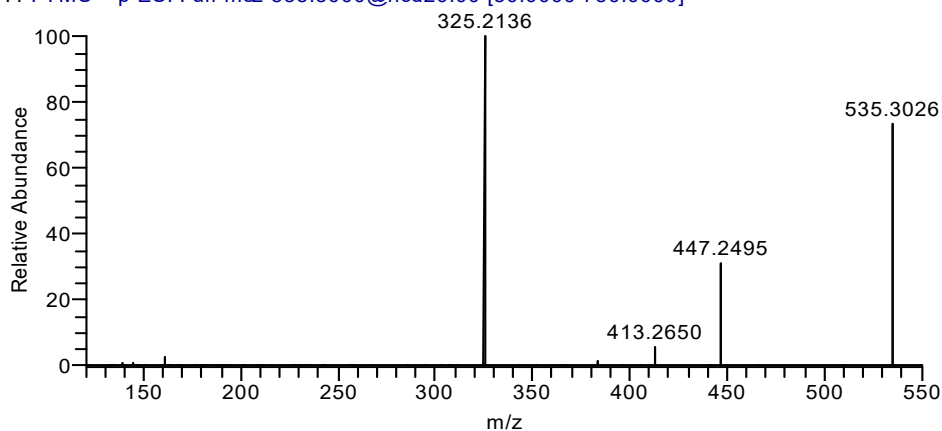

Fig. S35 MS and MS<sup>2</sup> spectra of vulgarisin J (4)

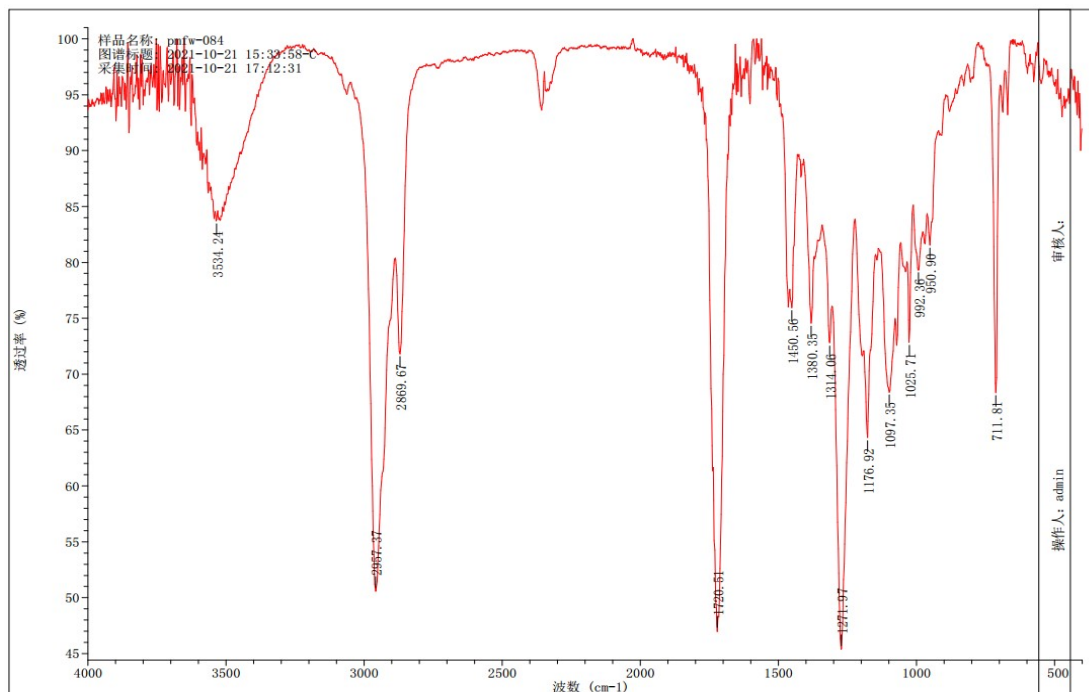

Fig. S36 FT-IR spectrum of vulgarisin J (4)



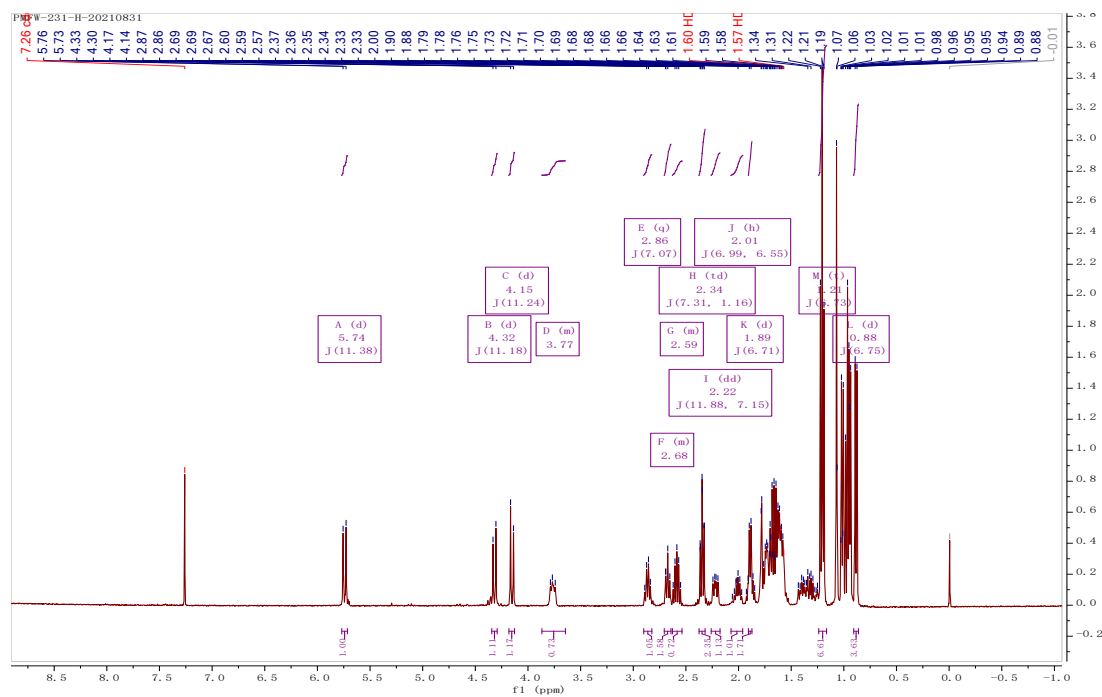

**Fig. S37** <sup>1</sup>H NMR spectrum of vulgarisin K (5)

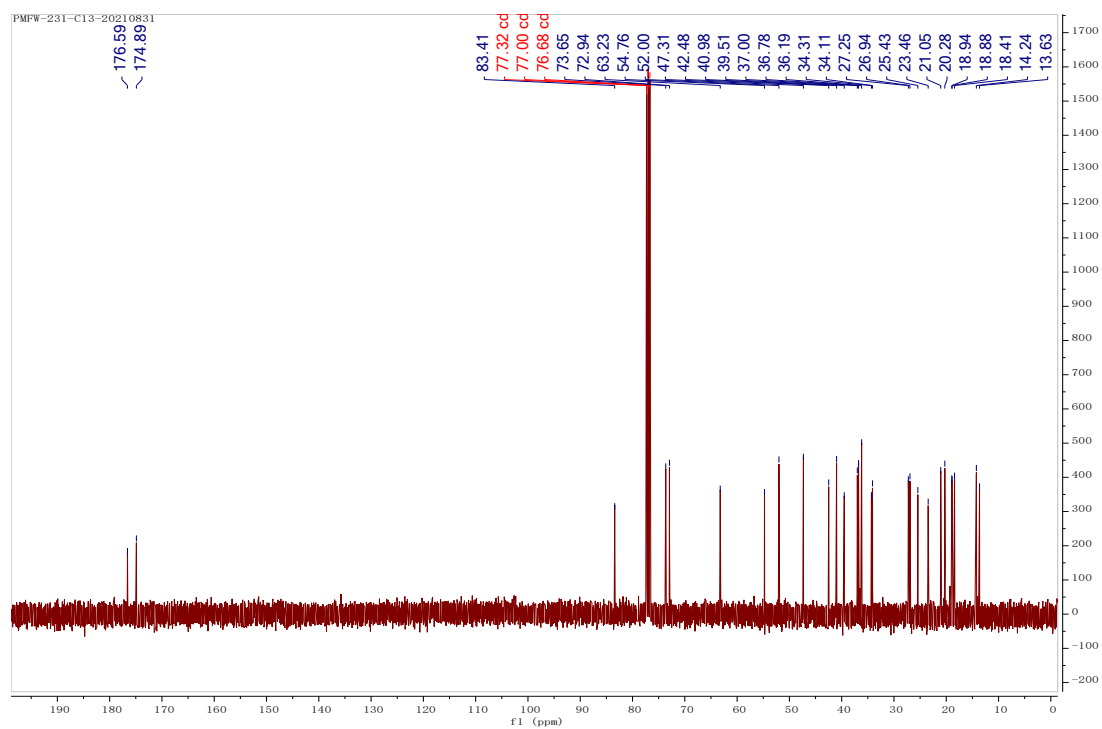

**Fig. S38** <sup>13</sup>C NMR spectrum of vulgarisin K (5)

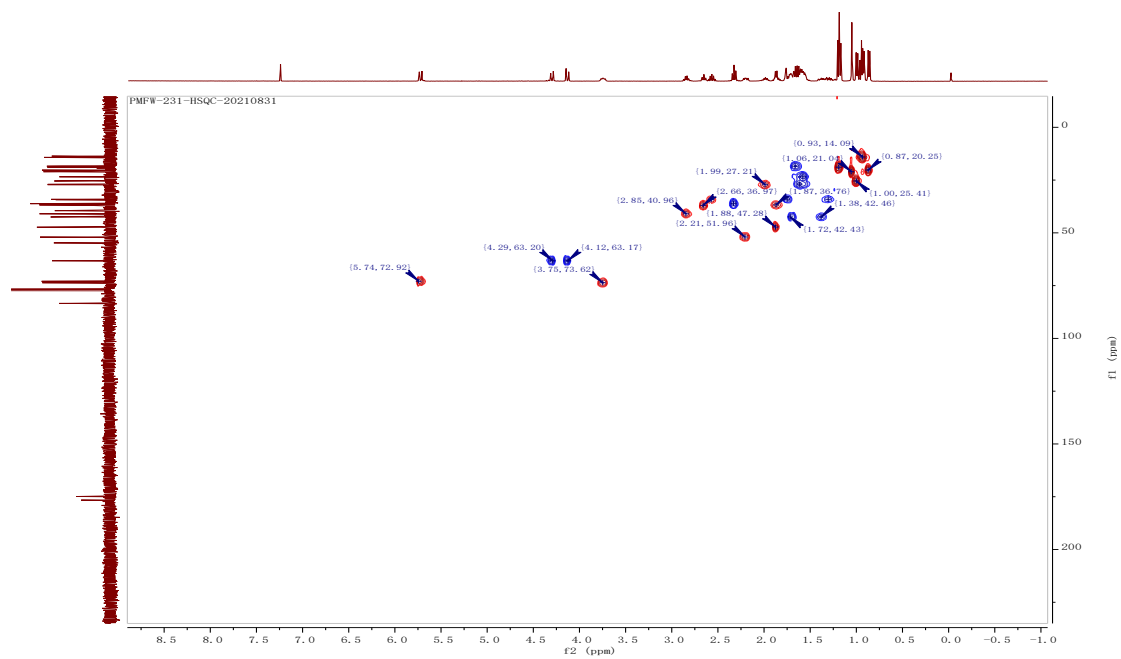

**Fig. S39** HSQC spectrum of vulgarisin K (5)

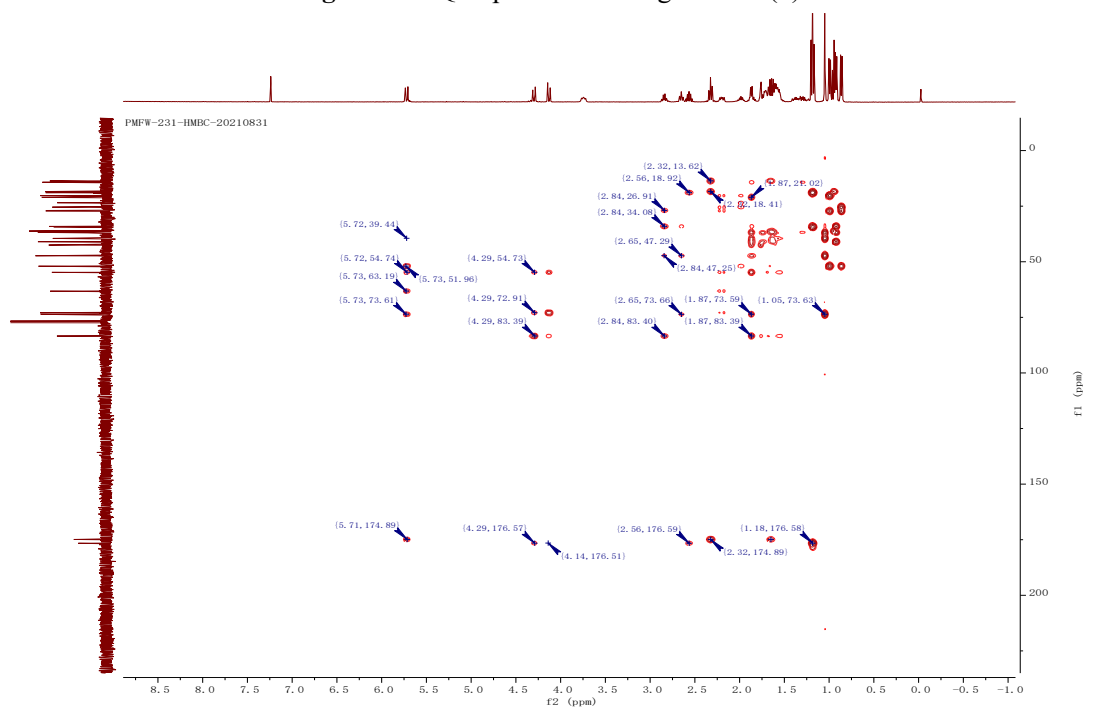

**Fig. S40** HMBC spectrum of vulgarisin K (5)

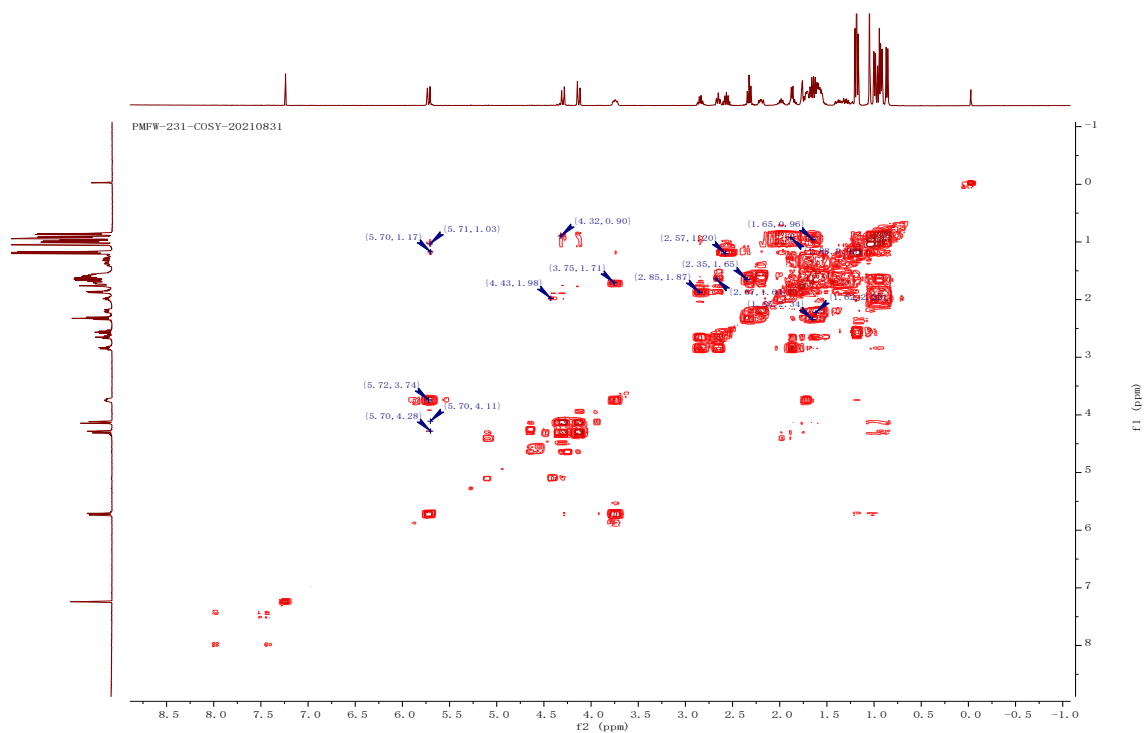

**Fig. S41**  $^1\text{H}$ - $^1\text{H}$  COSY spectrum of vulgarisin K (5)

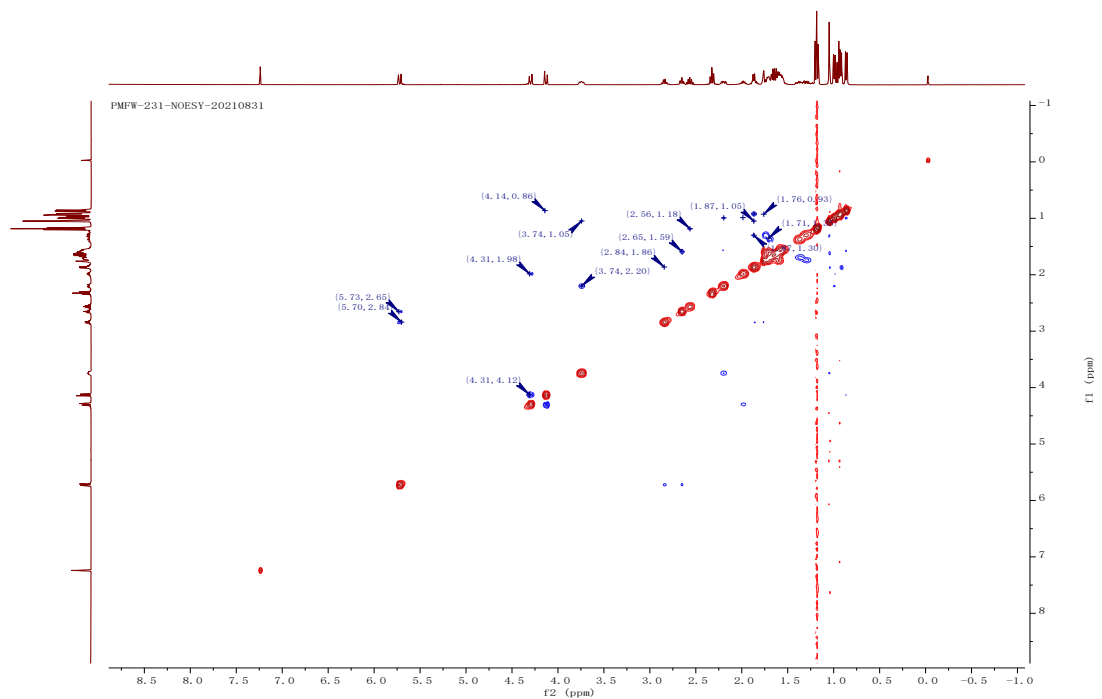

**Fig. S42** NOESY spectrum of vulgarisin K (5)

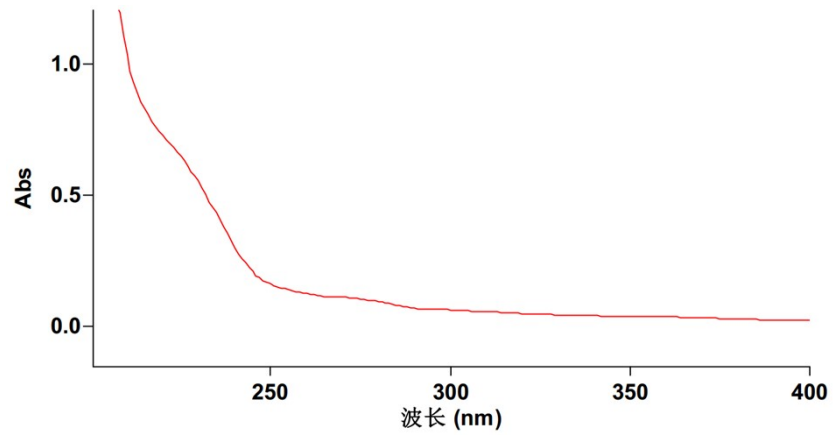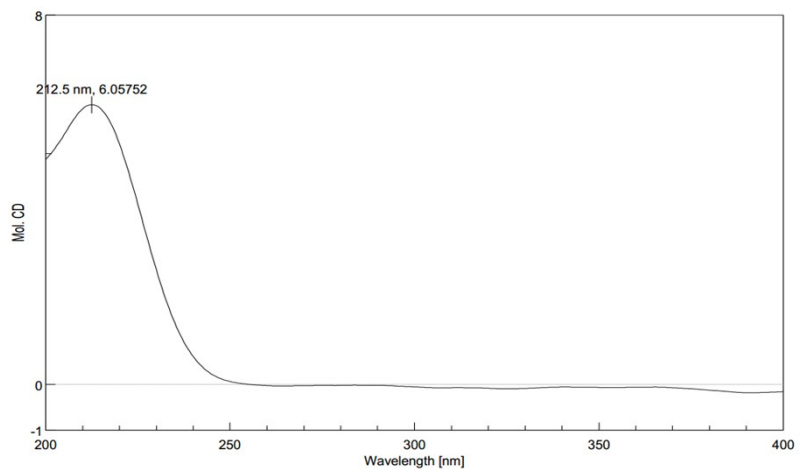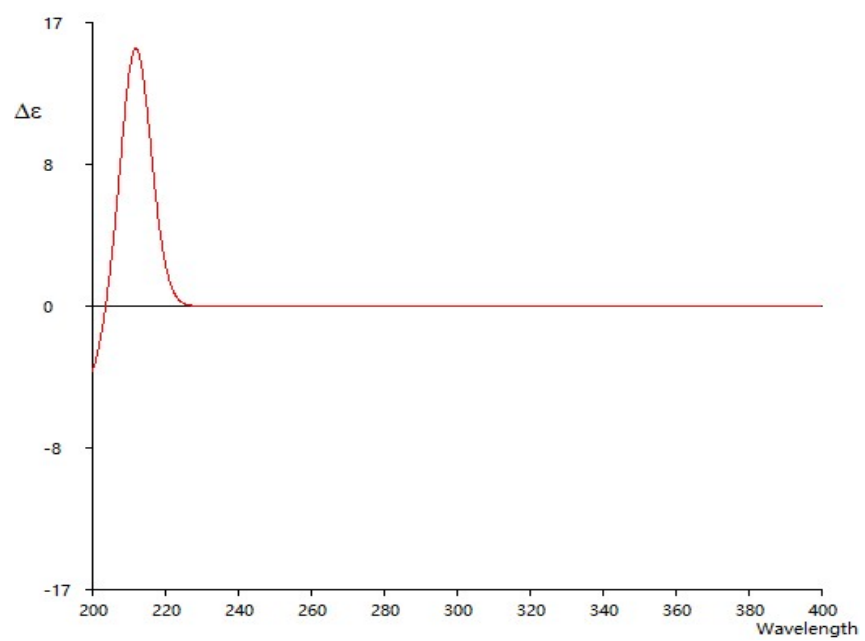

**Fig. S43** UV and CD spectra (experimental and calculated) of vulgarisin K (5)

PFMW-231 #1 RT: 0.00 AV: 1 NL: 3.90E9  
T: FTMS + p ESI Full ms [166.7000-2500.0000]

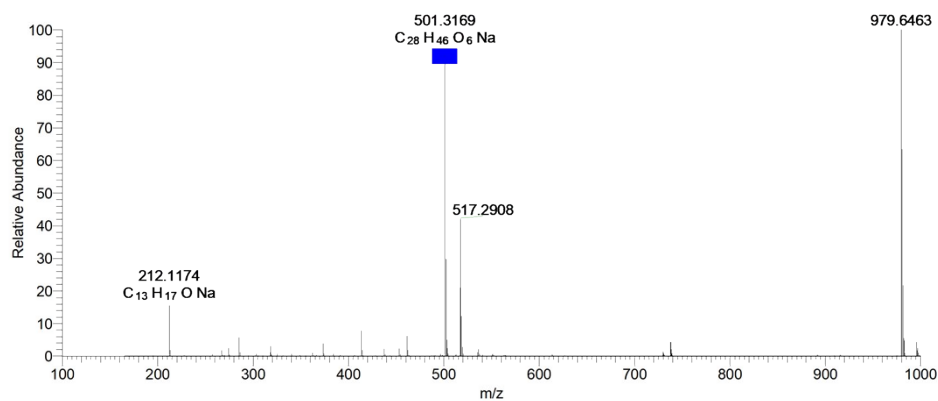

PFMW-231\_210902150959 #1 RT: 0.00 AV: 1 NL: 3.48E7  
T: FTMS + p ESI Full ms<sup>2</sup> 501.3000@hcd25.00 [50.0000-550.0000]

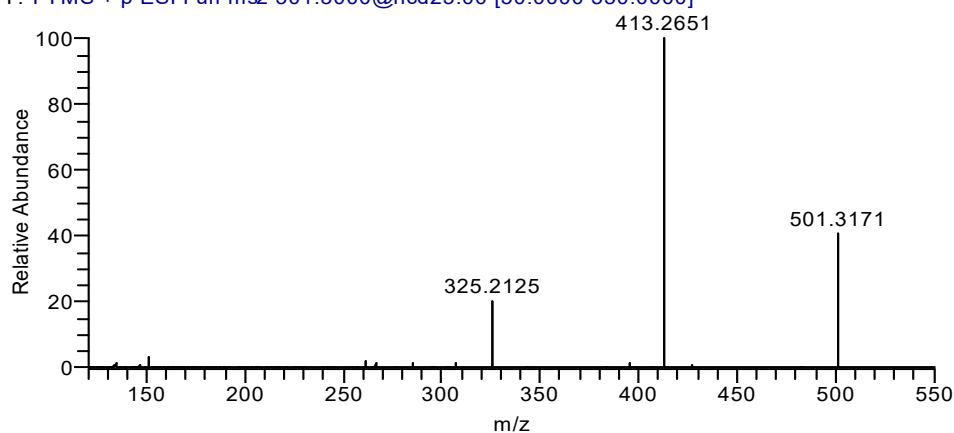

Fig. S44 MS and MS<sup>2</sup> spectra of vulgarisin K (5)

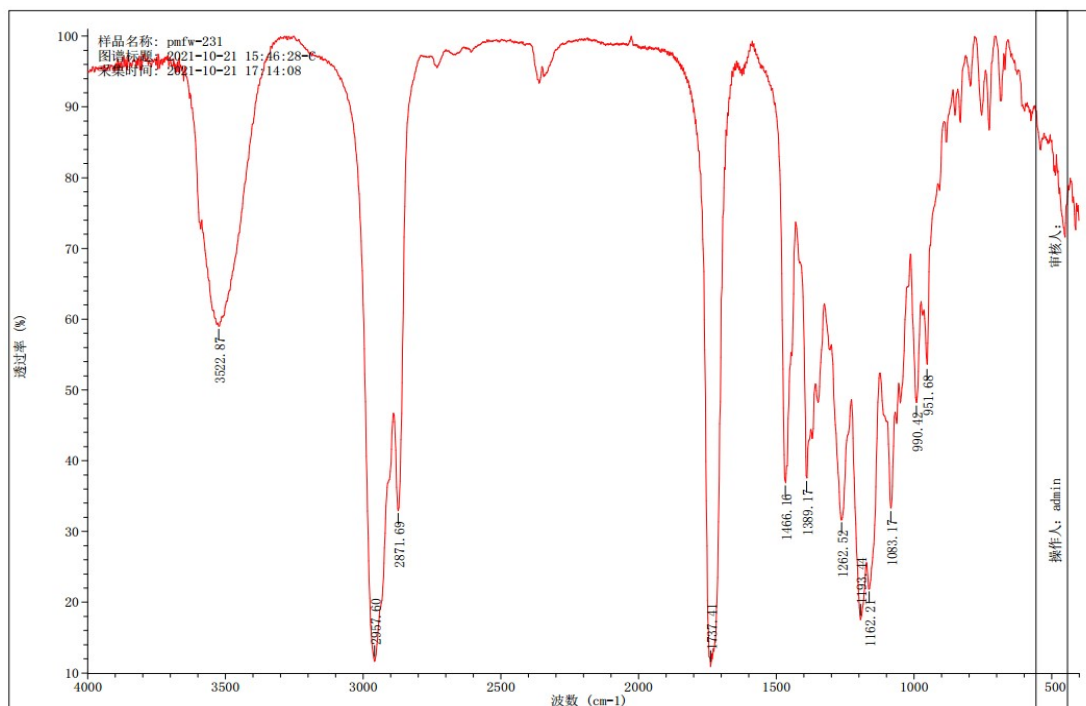

Fig. S45 FT-IR spectrum of vulgarisin K (5)

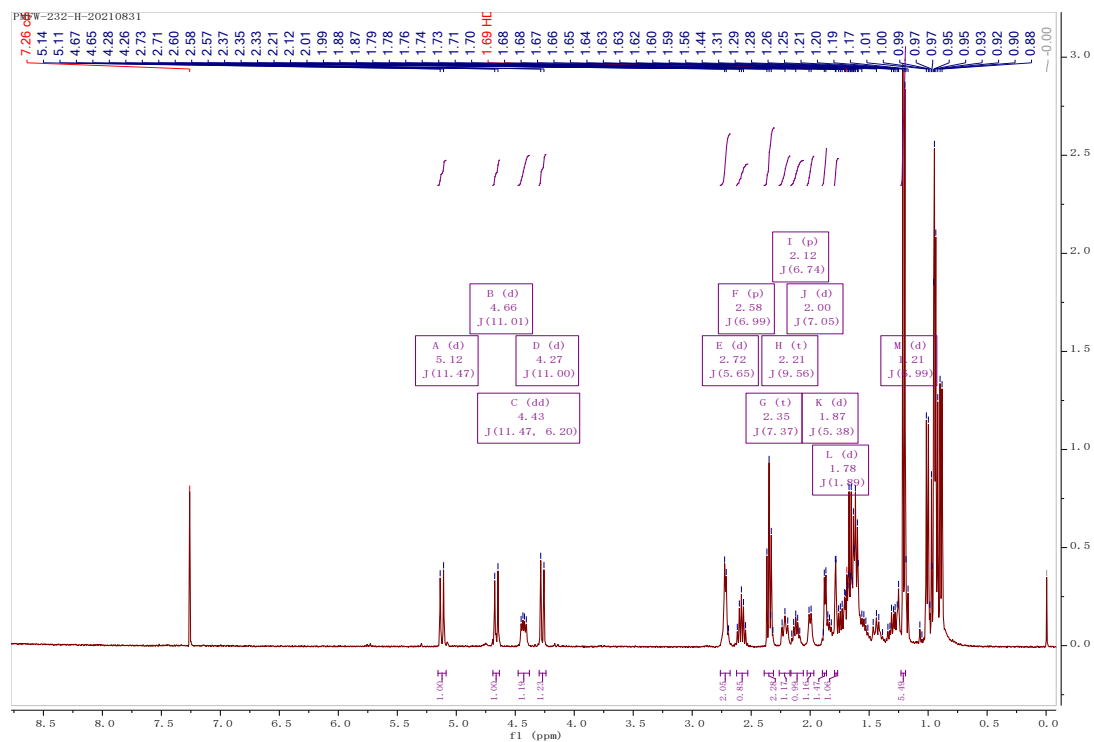

Fig. S46  $^1\text{H}$  NMR spectrum of vulgarisin L (6)

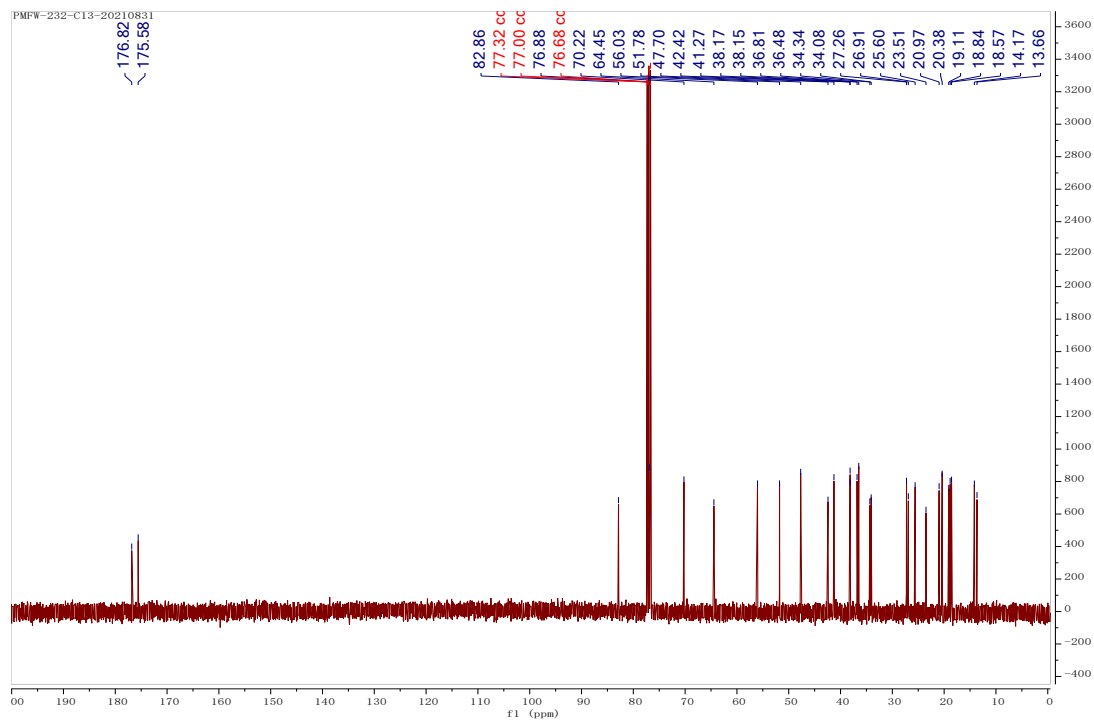

Fig. S47  $^{13}\text{C}$  NMR spectrum of vulgarisin L (6)

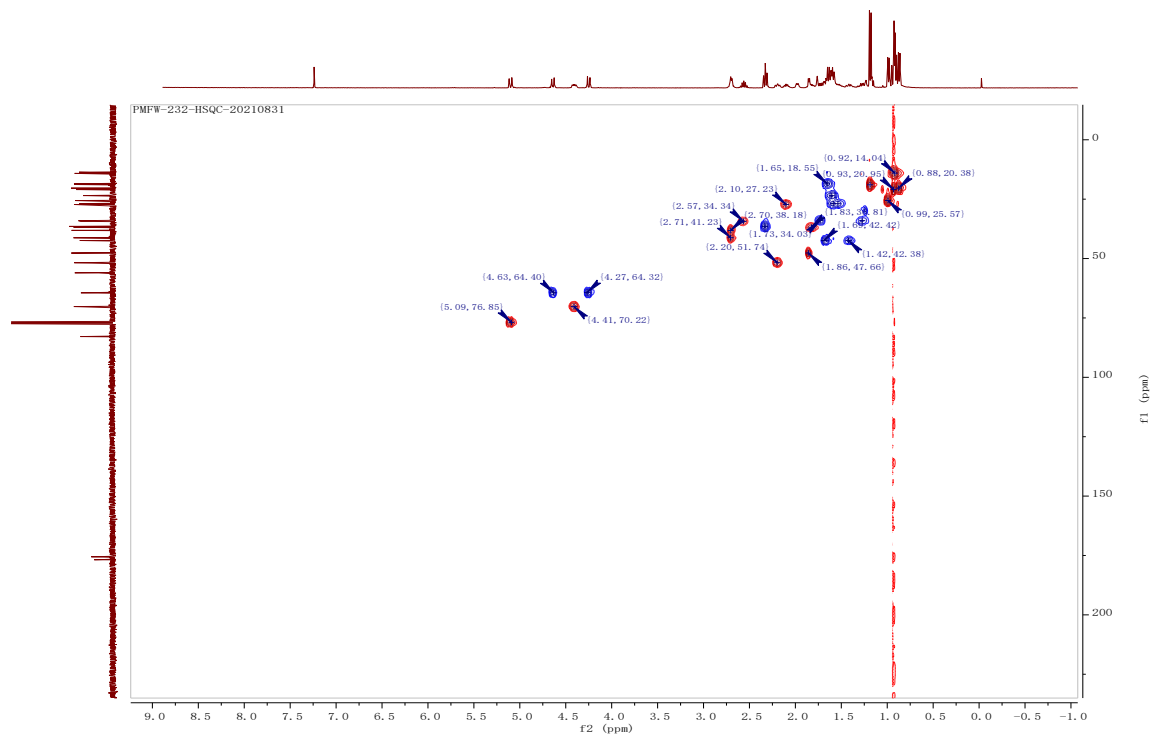

Fig. S48 HSQC spectrum of vulgarisin L (6)

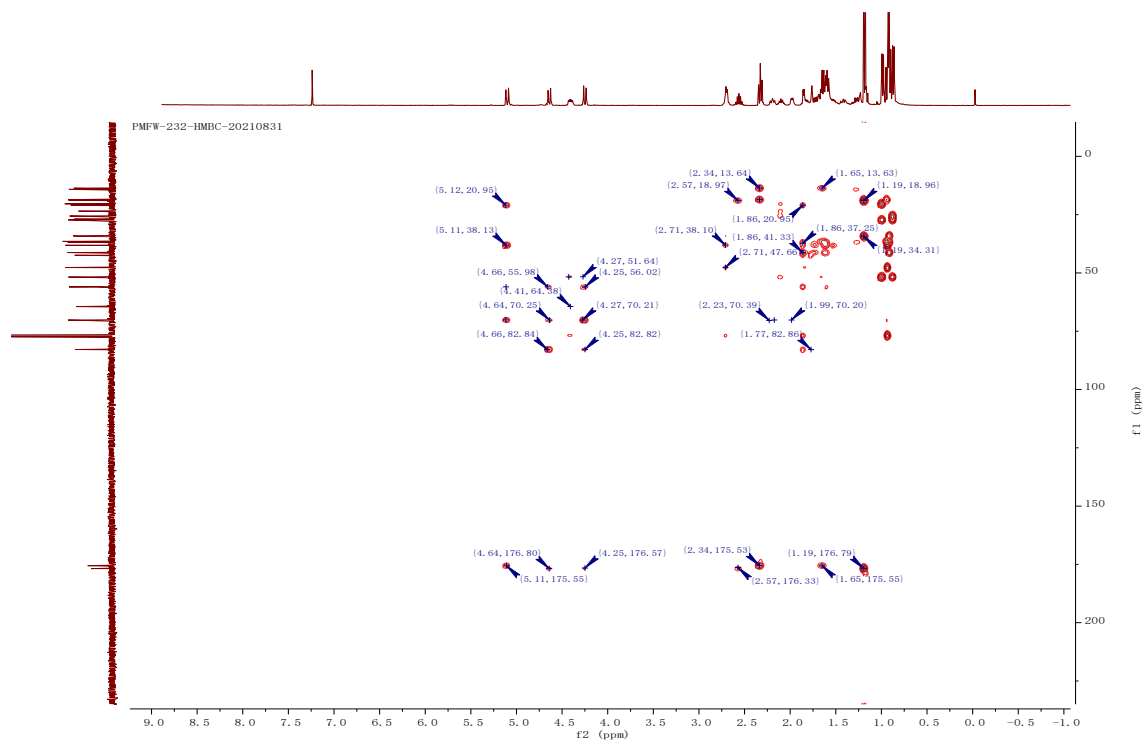

Fig. S49 HMBC spectrum of vulgarisin L (6)

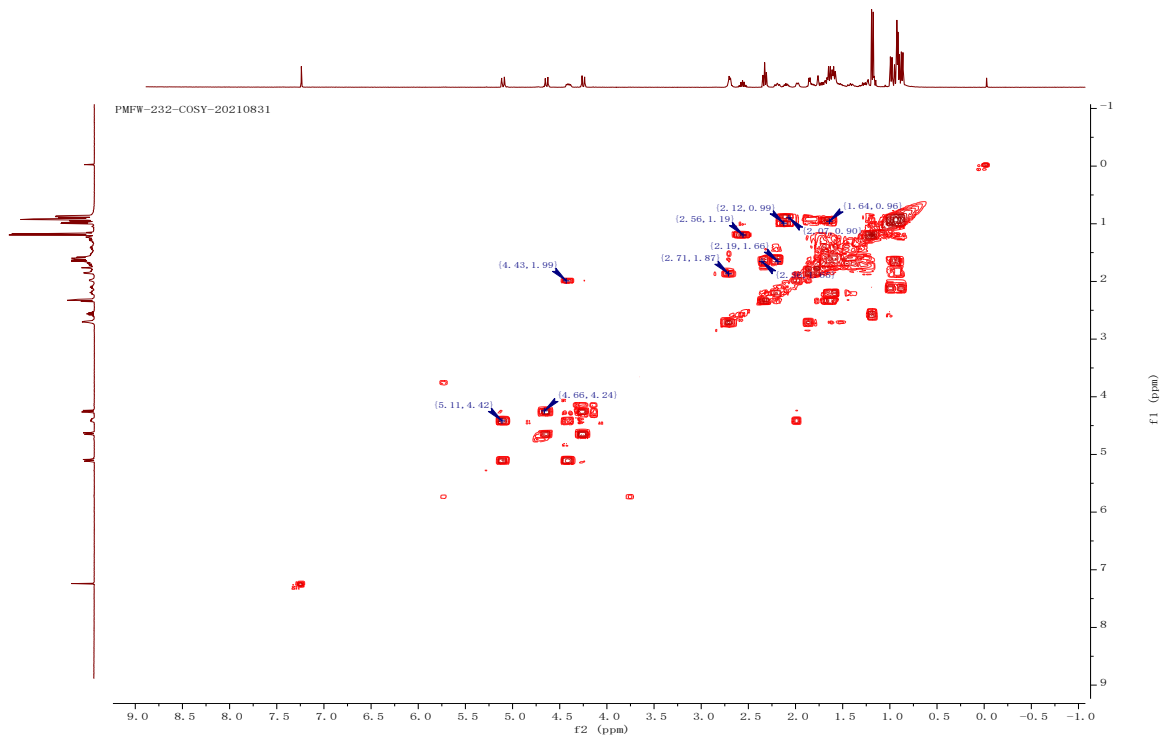

**Fig. S50**  $^1\text{H}$ - $^1\text{H}$  COSY spectrum of vulgarisin L (6)

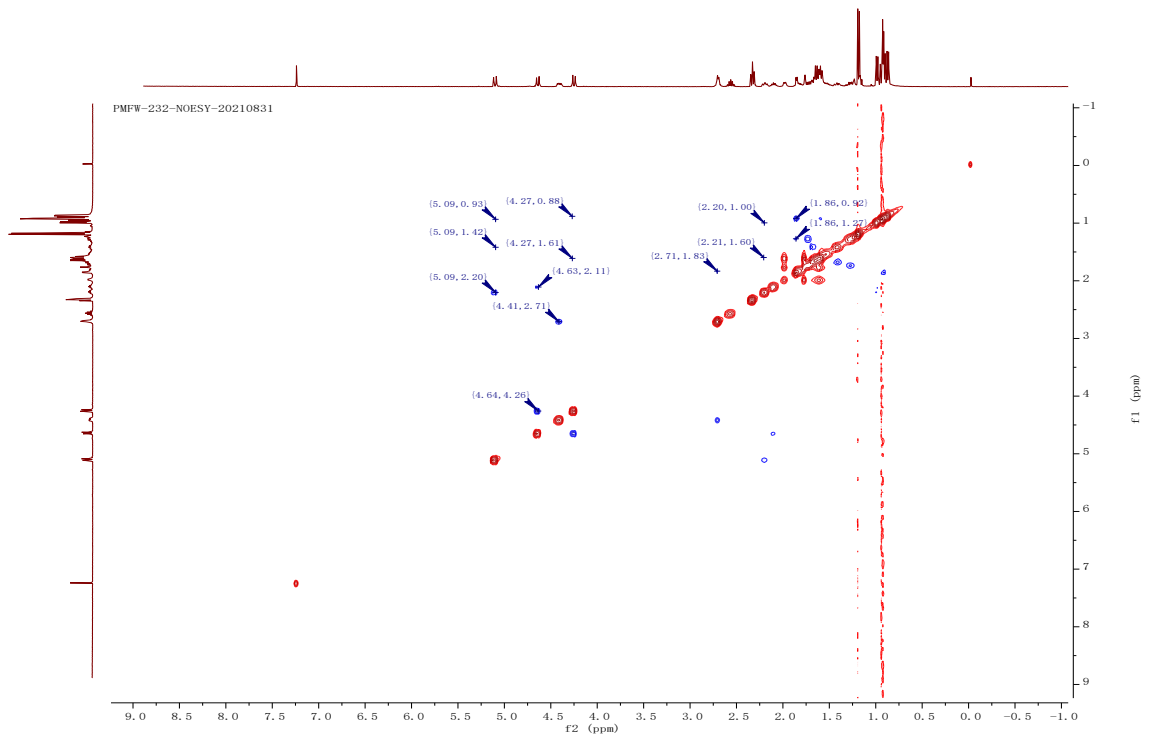

**Fig. S51** NOESY spectrum of vulgarisin L (6)



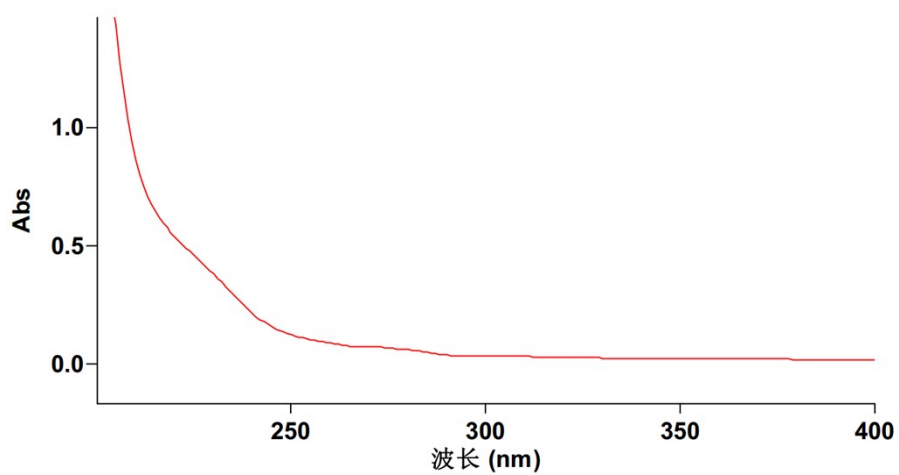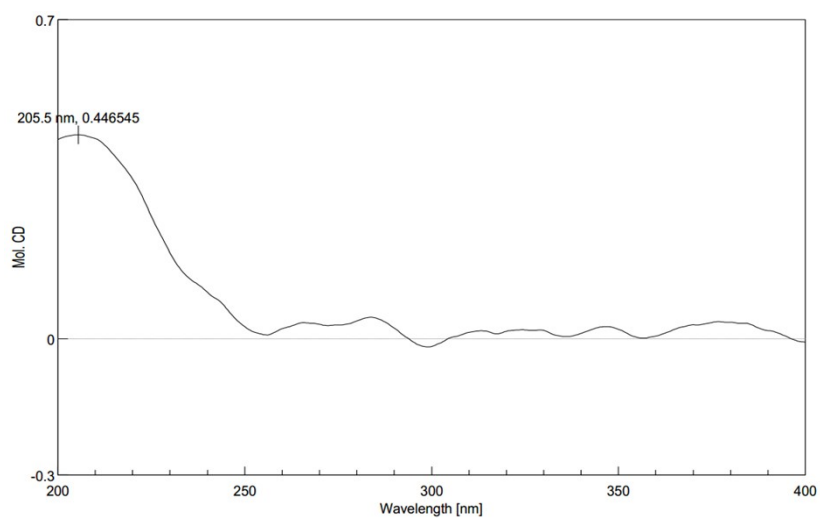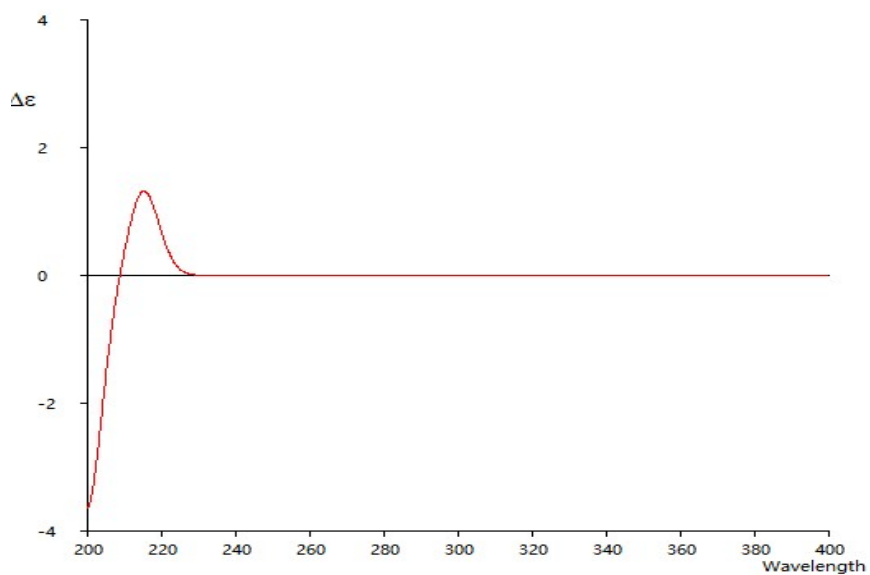

Fig. S52 UV and CD spectra (experimental and calculated) of vulgarisin L (6)

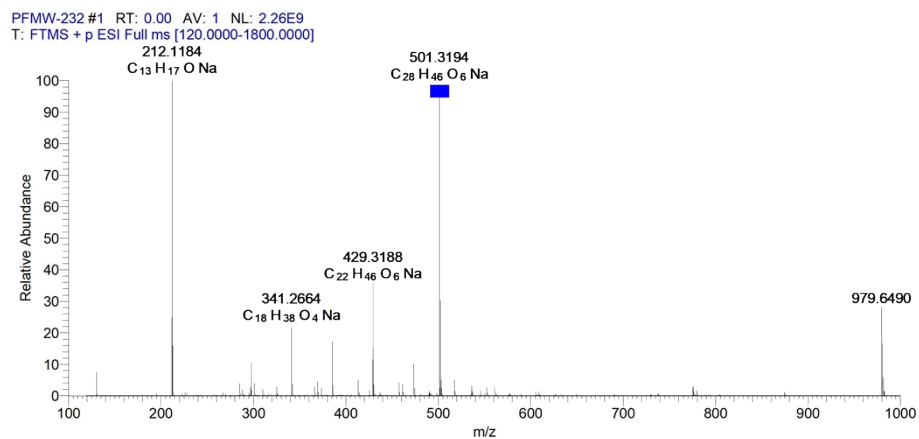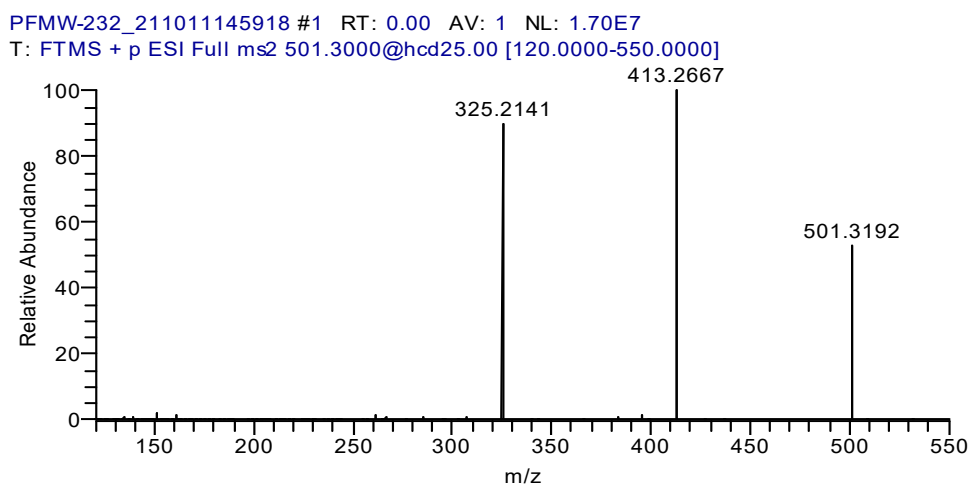

Fig. S53 MS and MS<sup>2</sup> spectra of vulgarisin L (6)

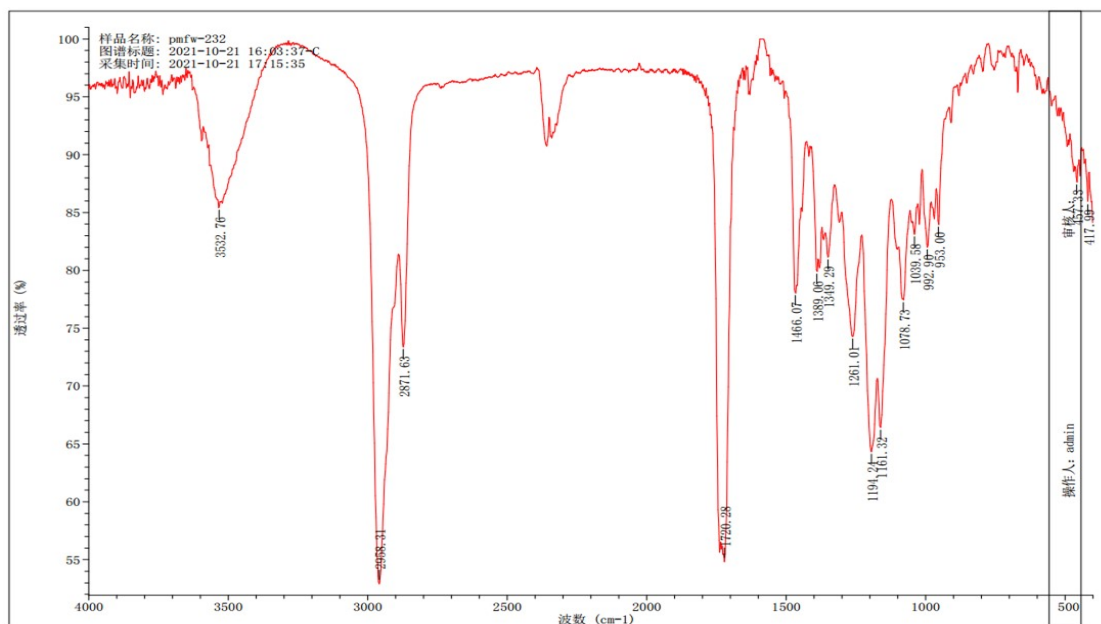

Fig. S54 FT-IR spectrum of vulgarisin L (6)

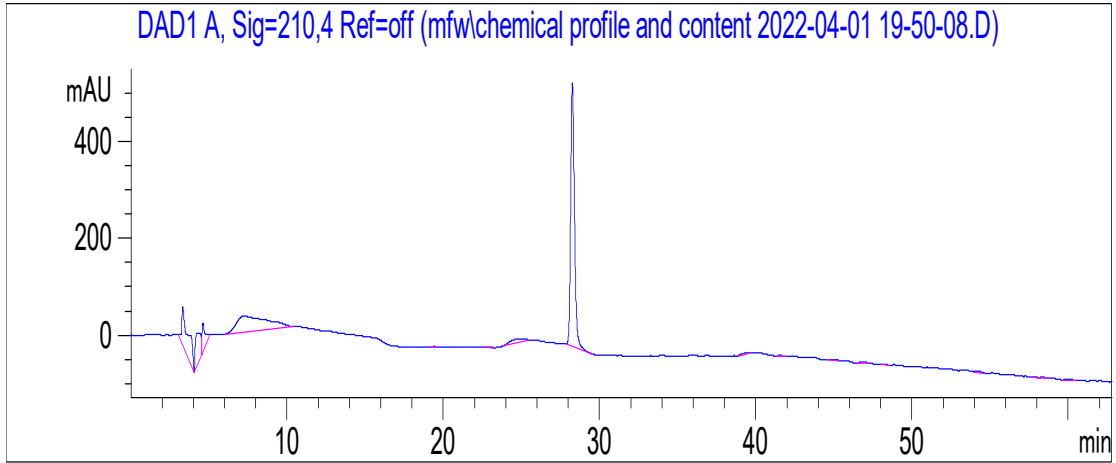

**Fig. S55** HPLC chromatogram of reference standard caffeic acid

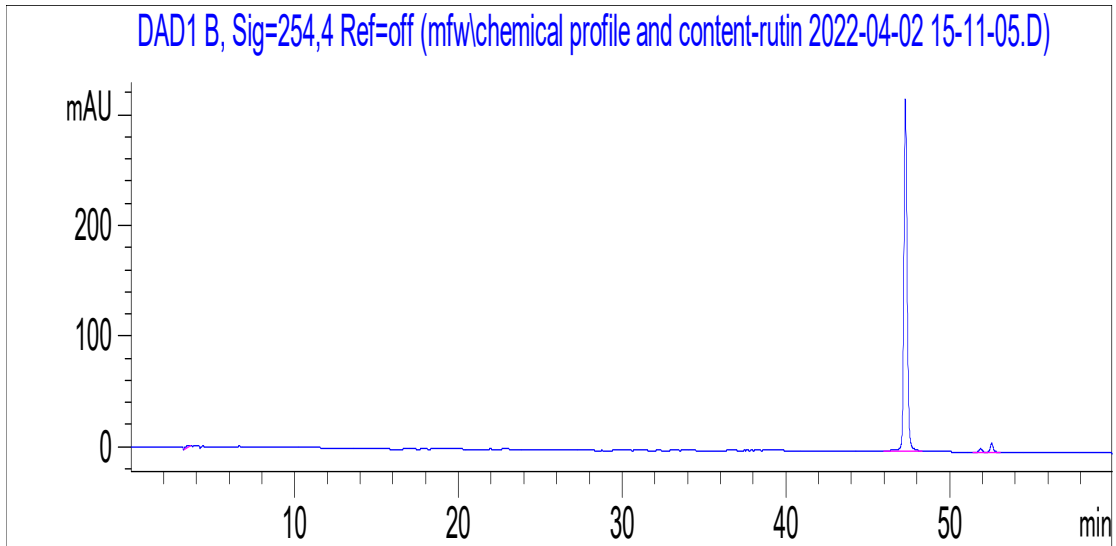

**Fig. S56** HPLC chromatogram of reference standard rutin

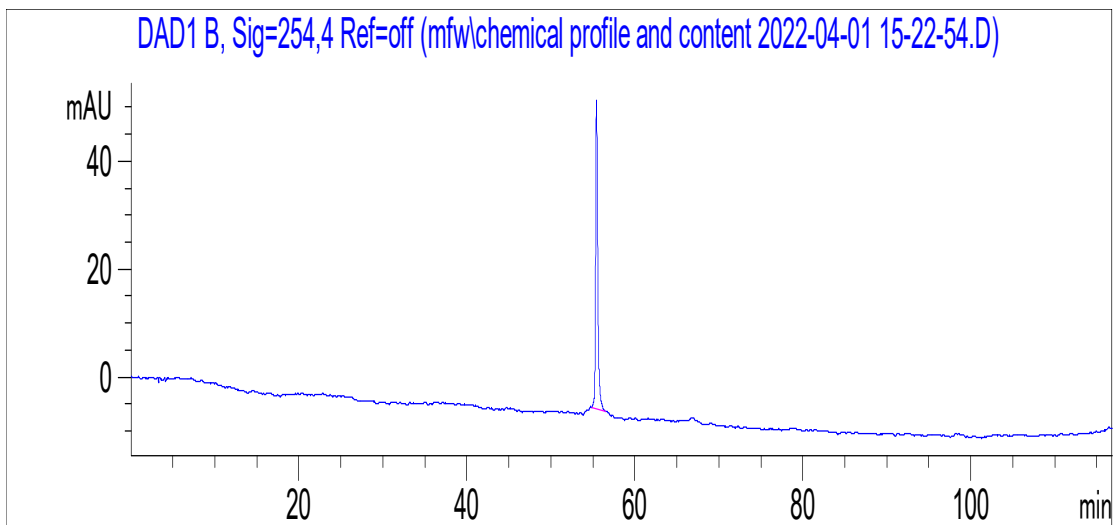

**Fig. S57** HPLC chromatogram of reference standard rosmarinic acid

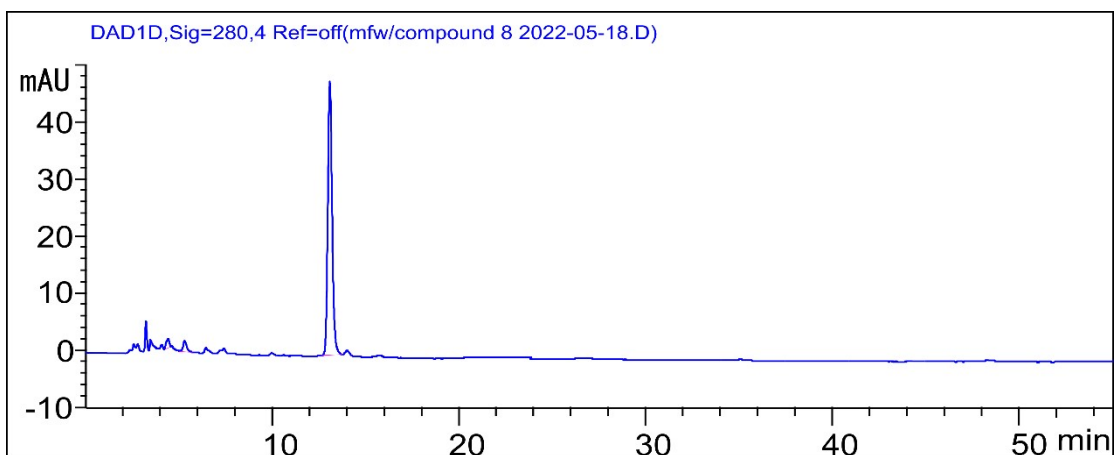

**Fig. S58** HPLC chromatogram of isolated reference compound vulgarism F (8)

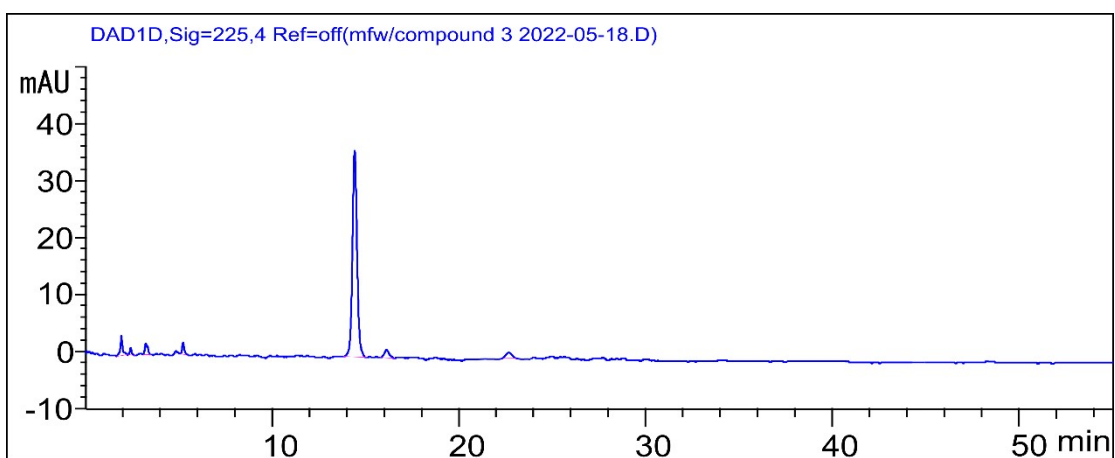

**Fig. S59** HPLC chromatogram of isolated reference compound vulgarism I (3)

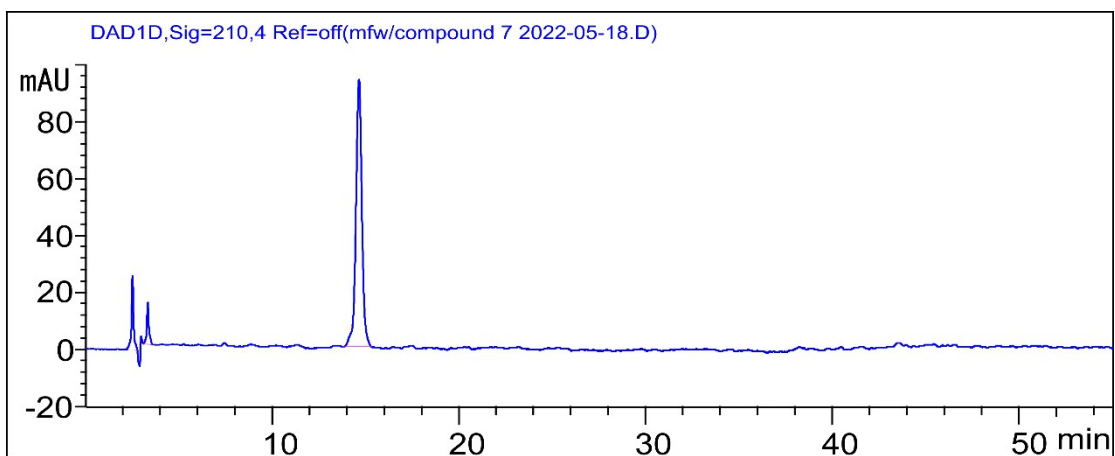

**Fig. S60** HPLC chromatogram of isolated reference compound vulgarism E (7)

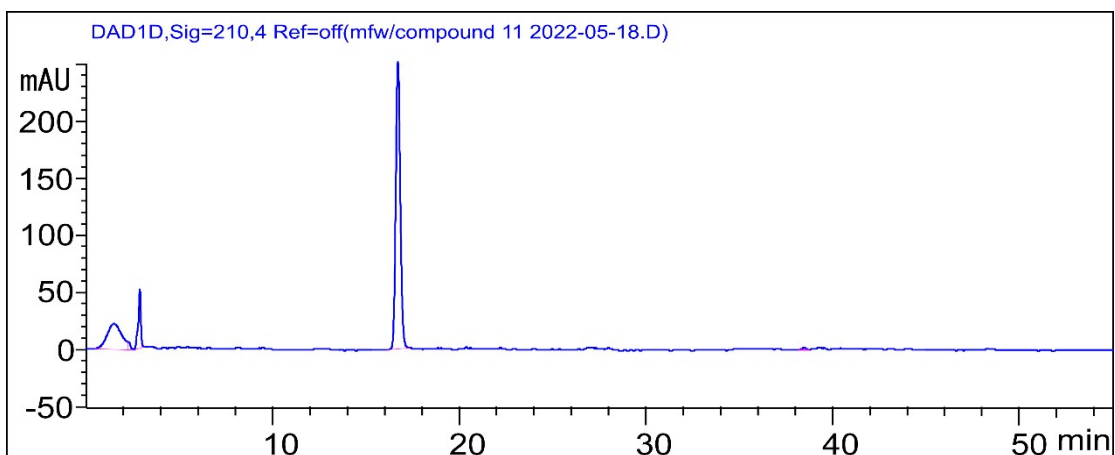

**Fig. S61** HPLC chromatogram of isolated reference compound vulgarism C (11)

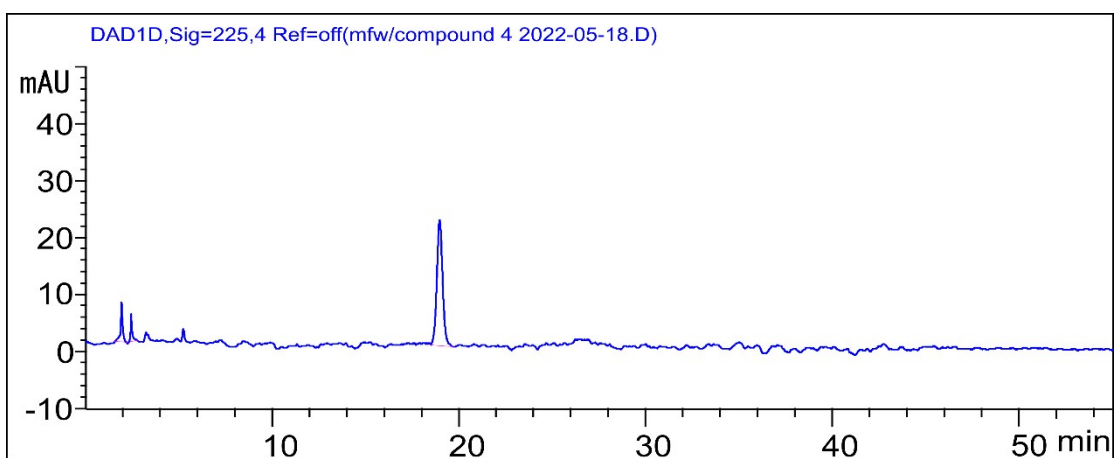

**Fig. S62** HPLC chromatogram of isolated reference compound vulgarism J (4)

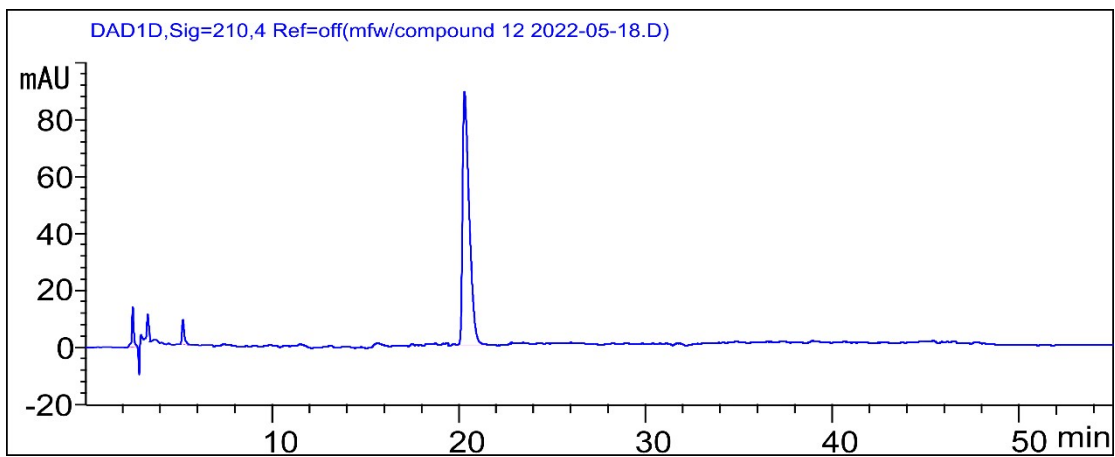

**Fig. S63** HPLC chromatogram of isolated reference compound vulgarism B (12)

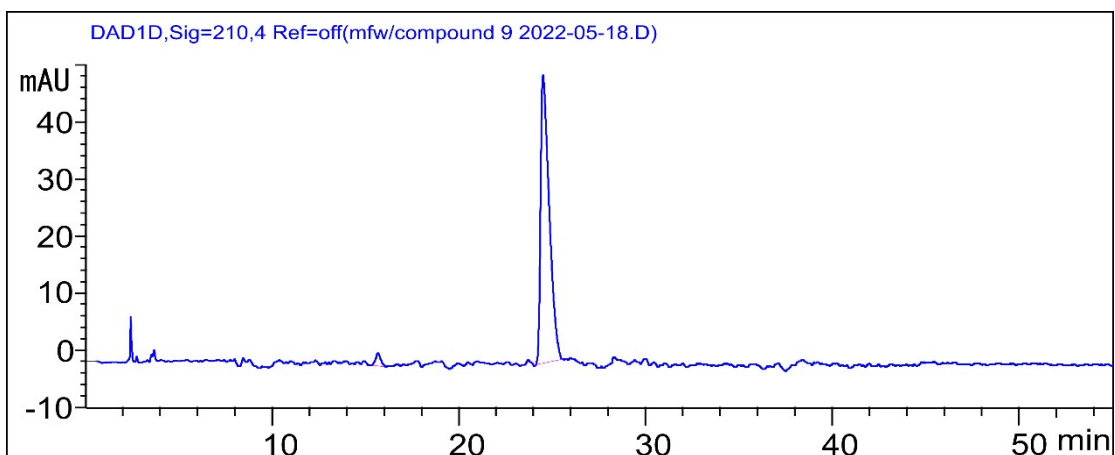

**Fig. S64** HPLC chromatogram of isolated reference compound vulgarism D (9)

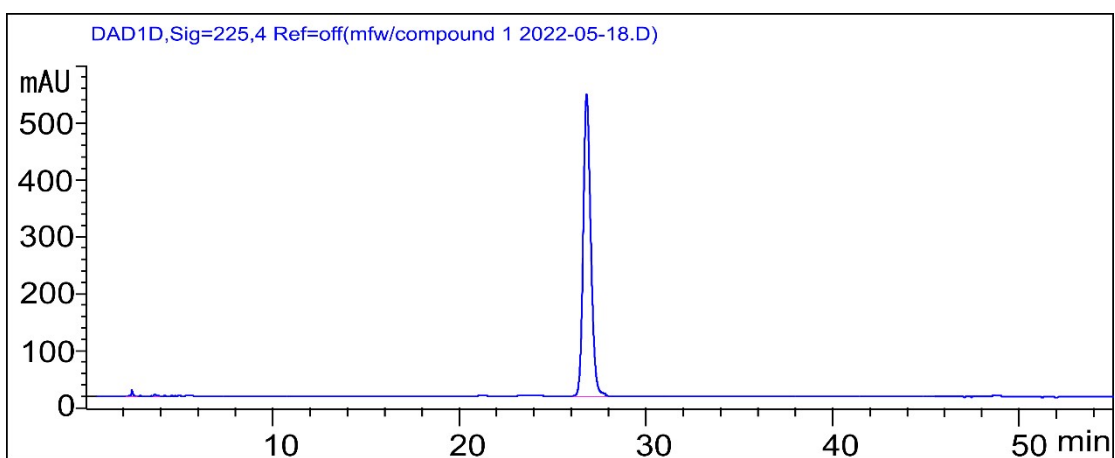

**Fig. S65** HPLC chromatogram of isolated reference compound vulgarism G (1)

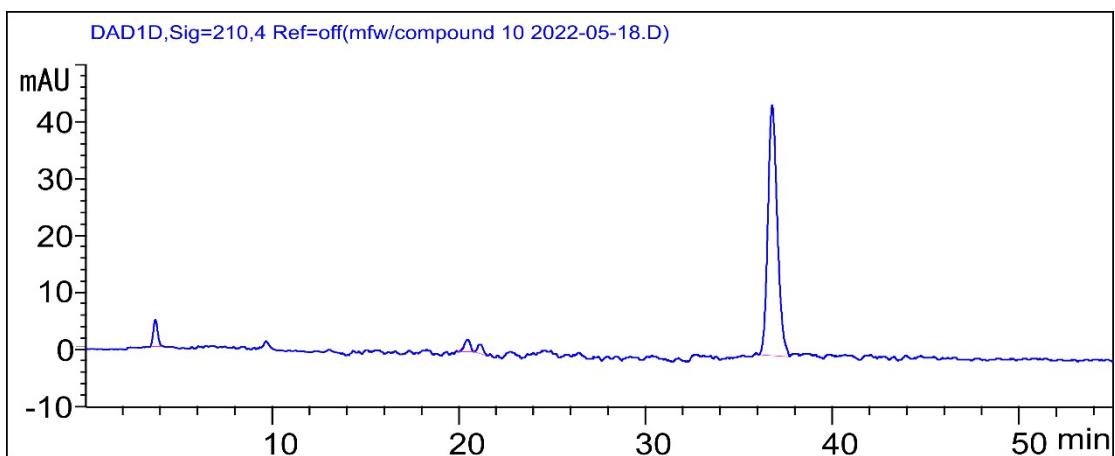

**Fig. S66** HPLC chromatogram of isolated reference compound vulgarism A (10)

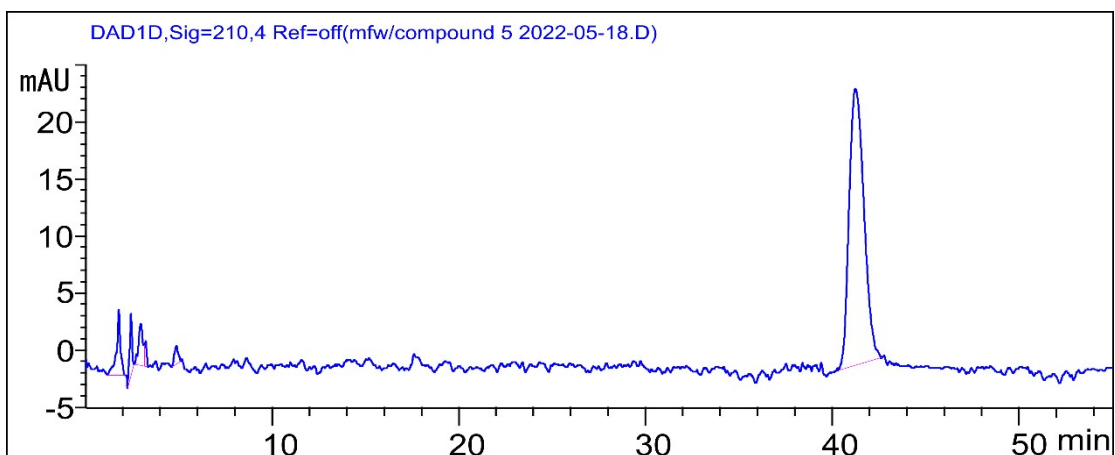

**Fig. S67** HPLC chromatogram of isolated reference compound vulgarism K (5)

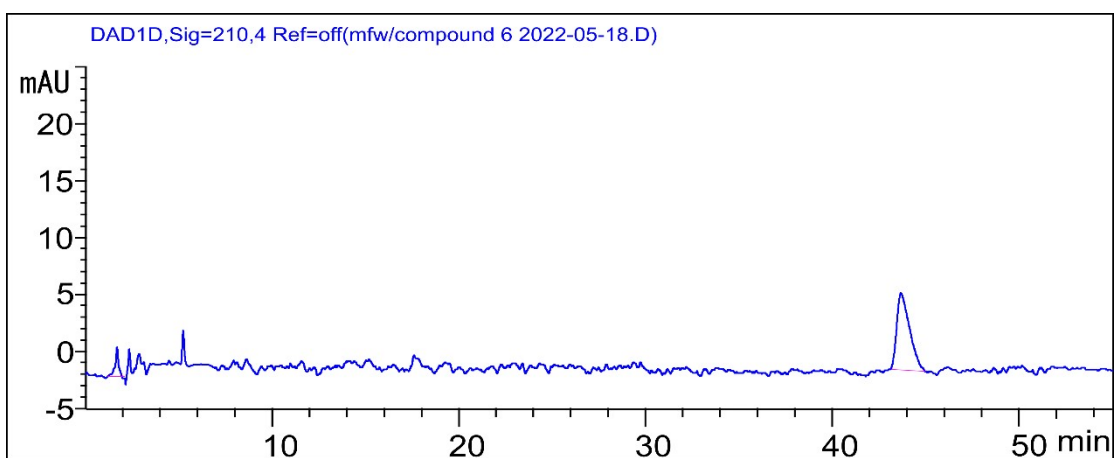

**Fig. S68** HPLC chromatogram of isolated reference compound vulgarism L (6)

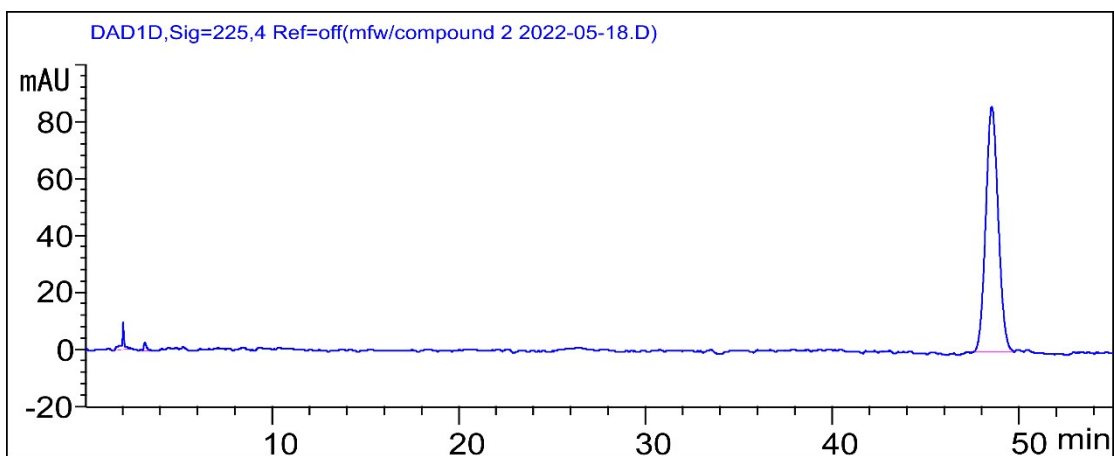

**Fig. S69** HPLC chromatogram of isolated reference compound vulgarism H (2)

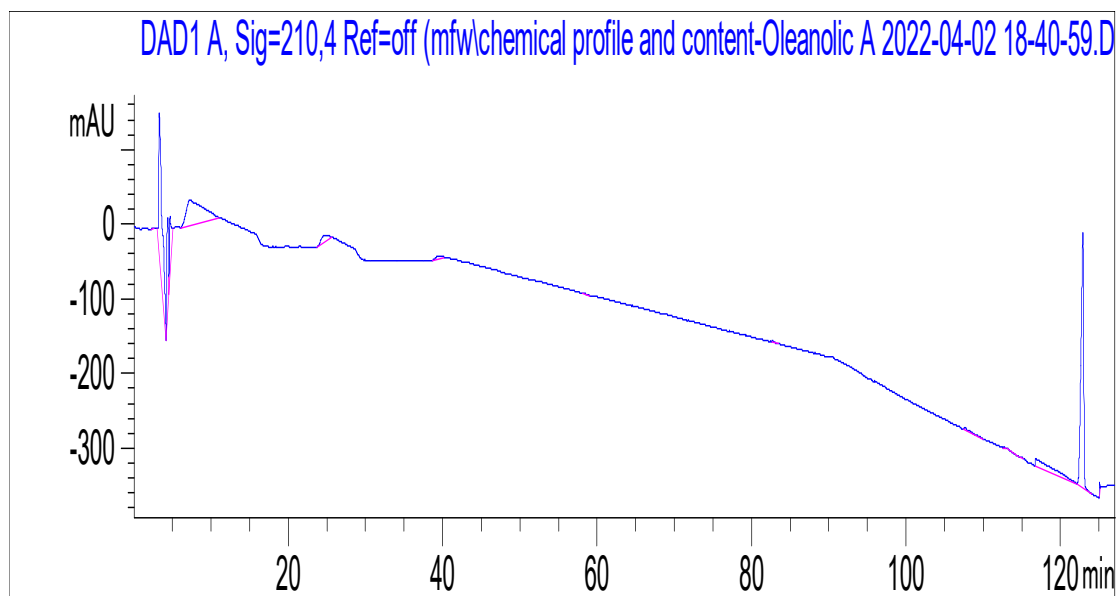

**Fig. S70** HPLC chromatogram of reference standard ursolic acid

xkc-0301 #3390 RT: 18.35 AV: 1 NL: 4.84E8  
T: FTMS - p ESI Full ms [100.0000-1200.0000]

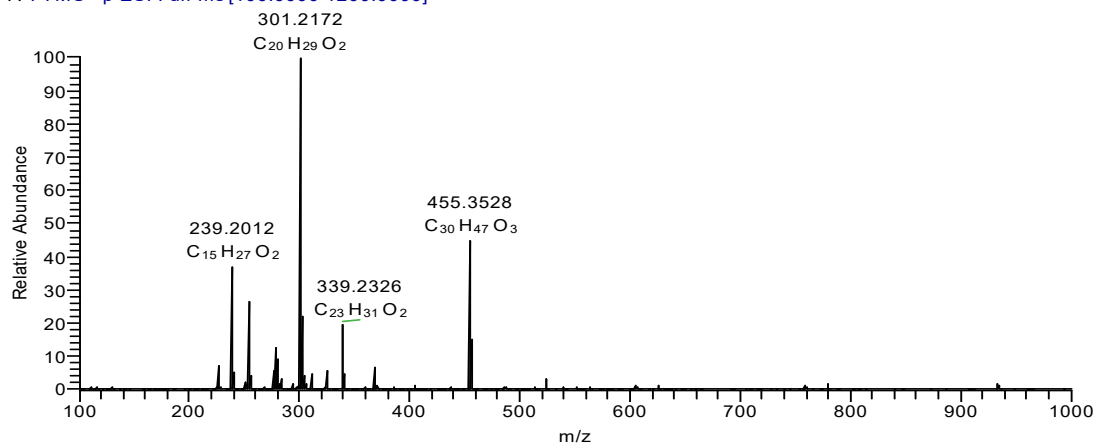

**Fig. S71** HRMS spectrum of tentatively identified compound oleanolic acid (Mw=456)

xkc-0301 #3362 RT: 18.20 AV: 1 NL: 3.37E9  
T: FTMS - p ESI Full ms [100.0000-1200.0000]

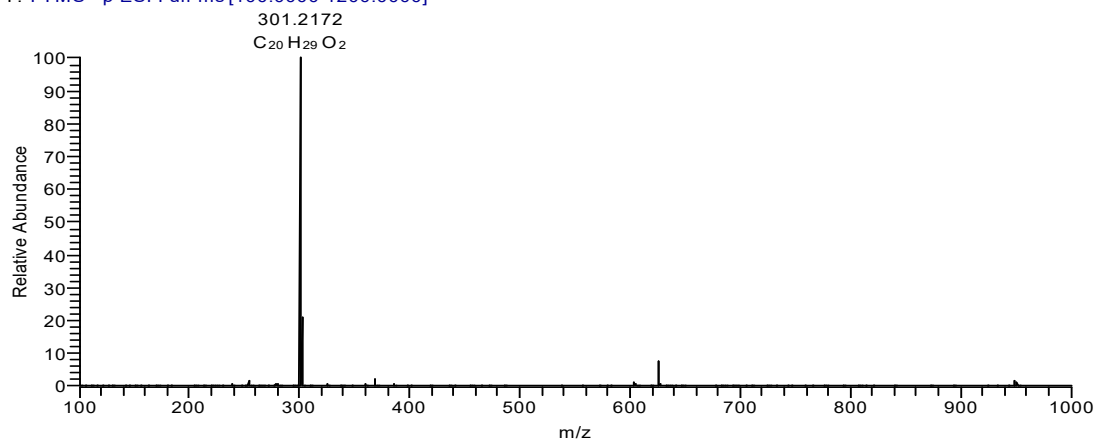

**Fig. S72** HRMS spectrum of tentatively identified compound abietic acid (Mw=302)



xkc-0301 #3528 RT: 19.09 AV: 1 NL: 1.10E8  
T: FTMS + p ESI Full ms [100.0000-1200.0000]

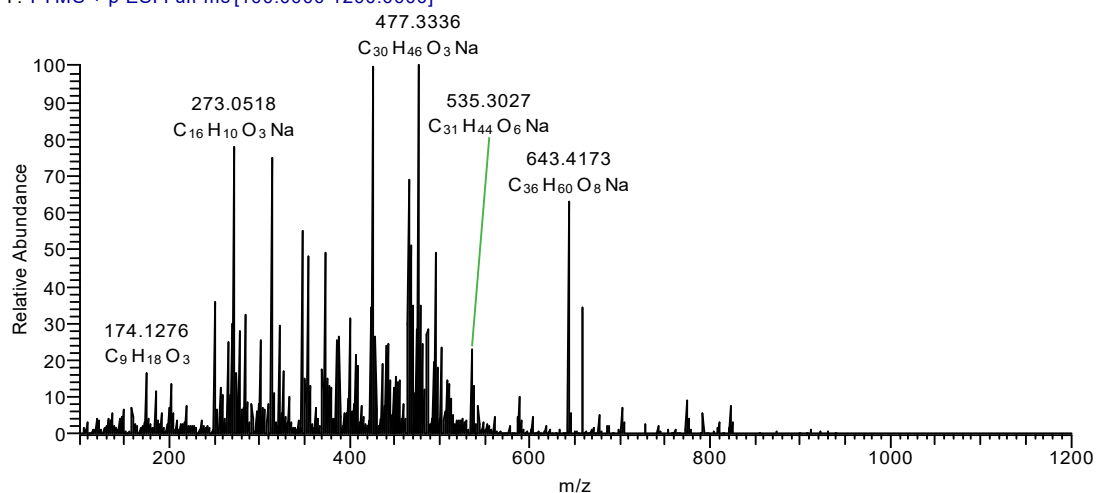

**Fig. S73** HRMS spectrum of tentatively identified compound ursonic acid (Mw=454)

xkc-0301 #3414 RT: 18.48 AV: 1 NL: 3.51E7  
T: FTMS - p ESI Full ms [100.0000-1200.0000]

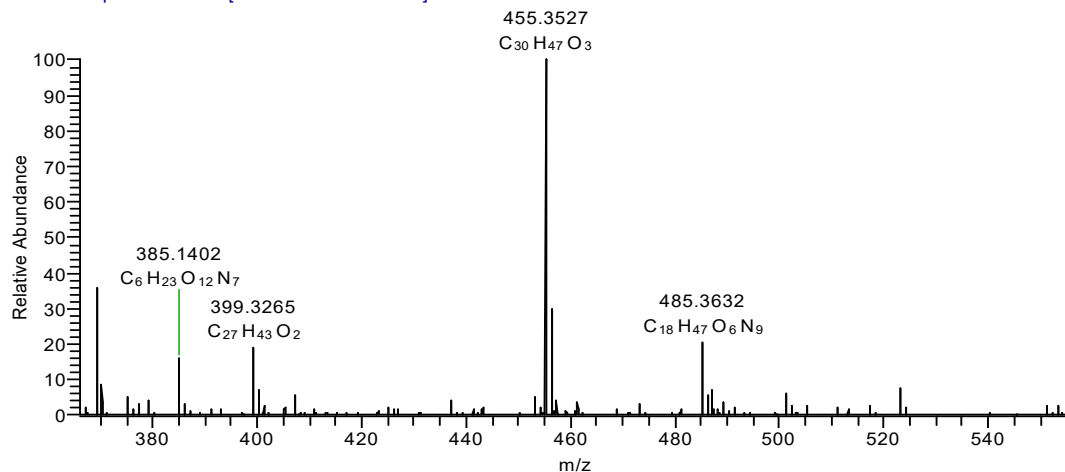

**Fig. S74** HRMS spectrum of tentatively identified compound betulinic acid (Mw=456)

xkc-0301 #3558 RT: 19.25 AV: 1 NL: 6.49E8  
T: FTMS - p ESI Full ms [100.0000-1200.0000]

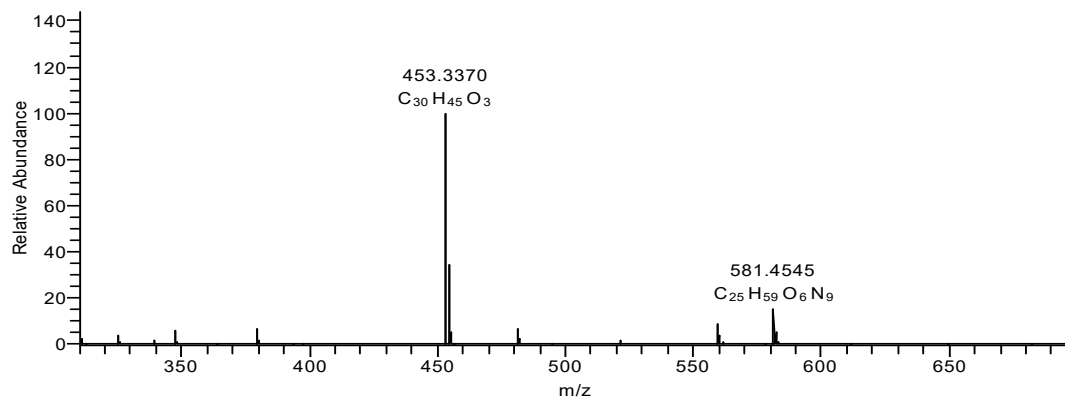

**Fig. S75** HRMS spectrum of tentatively identified compound dehydrotrameternolic acid  
(Mw=454)

| No. | Compounds                  | Identification method | Elementary composition                          | Reference |
|-----|----------------------------|-----------------------|-------------------------------------------------|-----------|
| 1   | Caffeic acid               | reference standard    | C <sub>9</sub> H <sub>8</sub> O <sub>4</sub>    | Fig. S55  |
| 2   | Rutin                      | reference standard    | C <sub>27</sub> H <sub>30</sub> O <sub>16</sub> | Fig. S56  |
| 3   | Rosmarinic acid            | reference standard    | C <sub>18</sub> H <sub>16</sub> O <sub>8</sub>  | Fig. S57  |
| 4   | Vulgarisin F ( <b>8</b> )  | isolated compound     | C <sub>33</sub> H <sub>46</sub> O <sub>6</sub>  | Fig. S58  |
| 5   | Vulgarisin I ( <b>3</b> )  | isolated compound     | C <sub>31</sub> H <sub>44</sub> O <sub>6</sub>  | Fig. S59  |
| 6   | Vulgarisin E ( <b>7</b> )  | isolated compound     | C <sub>31</sub> H <sub>44</sub> O <sub>6</sub>  | Fig. S60  |
| 7   | Vulgarisin C ( <b>11</b> ) | isolated compound     | C <sub>31</sub> H <sub>44</sub> O <sub>6</sub>  | Fig. S61  |
| 8   | Vulgarisin J ( <b>4</b> )  | isolated compound     | C <sub>31</sub> H <sub>44</sub> O <sub>6</sub>  | Fig. S62  |
| 9   | Vulgarisin B ( <b>12</b> ) | isolated compound     | C <sub>31</sub> H <sub>44</sub> O <sub>6</sub>  | Fig. S63  |
| 10  | Vulgarisin D ( <b>9</b> )  | isolated compound     | C <sub>28</sub> H <sub>46</sub> O <sub>6</sub>  | Fig. S64  |
| 11  | Vulgarisin G ( <b>1</b> )  | isolated compound     | C <sub>34</sub> H <sub>42</sub> O <sub>6</sub>  | Fig. S65  |
| 12  | Vulgarisin A ( <b>10</b> ) | isolated compound     | C <sub>28</sub> H <sub>46</sub> O <sub>6</sub>  | Fig. S66  |
| 13  | Vulgarisin K ( <b>5</b> )  | isolated compound     | C <sub>28</sub> H <sub>46</sub> O <sub>6</sub>  | Fig. S67  |
| 14  | Vulgarisin L ( <b>6</b> )  | isolated compound     | C <sub>28</sub> H <sub>46</sub> O <sub>6</sub>  | Fig. S68  |
| 15  | Vulgarisin H ( <b>2</b> )  | isolated compound     | C <sub>34</sub> H <sub>42</sub> O <sub>6</sub>  | Fig. S69  |
| 16  | Ursolic acid               | reference standard    | C <sub>30</sub> H <sub>48</sub> O <sub>3</sub>  | Fig. S70  |
| 17  | Oleanolic acid             | HRMS                  | C <sub>30</sub> H <sub>48</sub> O <sub>3</sub>  | Fig. S71  |
| 18  | Abietic acid               | HRMS                  | C <sub>20</sub> H <sub>30</sub> O <sub>2</sub>  | Fig. S72  |
| 19  | Ursonic acid               | HRMS                  | C <sub>30</sub> H <sub>46</sub> O <sub>3</sub>  | Fig. S73  |
| 20  | Betulinic acid,            | HRMS                  | C <sub>30</sub> H <sub>48</sub> O <sub>3</sub>  | Fig. S74  |
| 21  | Dehydrotrameternolic acid  | HRMS                  | C <sub>30</sub> H <sub>46</sub> O <sub>3</sub>  | Fig. S75  |
| 22  | Baicalin                   | HRMS                  | C <sub>21</sub> H <sub>18</sub> O <sub>11</sub> | -         |
| 23  | Cafestol                   | HRMS                  | C <sub>20</sub> H <sub>28</sub> O <sub>3</sub>  | -         |
| 24  | Salviaflaside              | literature            | C <sub>24</sub> H <sub>26</sub> O <sub>13</sub> | 1         |
| 25  | Sterol glucosides          | literature            | -                                               | 2,3       |
| 26  | Coumarins                  | literature            | -                                               | 4         |
| 27  | Flavones                   | literature            | -                                               | 5         |

Table S1 Chemical profile of *P. vulgaris*

1. Q. Junna, Z. Yu, Z. Shuang, L. Bin, J. Yanyan and C. Fafeng, Quality control of *Prunella vulgaris* based on HPLC fingerprints combined with chemical pattern recognition and content determination, *Chinese Traditional and Herbal Drugs*, 2020, **51**, 2842-2850.
2. H.-Y. Lou, J.-N. Yao, J. Pan, S. Zheng, Y.-Z. Liu, G.-Y. Liang and W.-D. Pan, C21 Steroidal Glycosides from *Prunella vulgaris*, *Journal of Carbohydrate Chemistry*, 2015, **34**, 358-364.
3. H. Kojima, N. Sato, A. Hatano and H. Ogura, Sterol glucosides from *Prunella vulgaris*, *Phytochemistry*, 1990, **29**, 2351-2355.
4. S. I. Dmitruk, Coumarins of *Prunella vulgaris*, *Chemistry of Natural Compounds*, 1986, **22**, 480.
5. I. S. Dmitruk, S. E. Dmitruk, T. P. Berezovskaya and T. P. Prishchep, Flavones of *Prunella vulgaris*, *Chemistry of Natural Compounds*, 1987, **23**, 374-375.

#### Reference
